1 **Flat-to-curved transition during clathrin-mediated**  
2 **endocytosis correlates with a change in clathrin-adaptor**  
3 **ratio and is regulated by membrane tension**

4

5 Delia Bucher<sup>1,2\*</sup>, Felix Frey<sup>3,4\*</sup>, Kem A. Sochacki<sup>5</sup>, Susann Kummer<sup>1</sup>, Jan-Philip  
6 Bergeest<sup>2,3,6</sup>, William J. Godinez<sup>2,3,6</sup>, Hans-Georg Kräusslich<sup>1</sup>, Karl Rohr<sup>2,3,6</sup>, Justin W.  
7 Taraska<sup>5</sup>, Ulrich S. Schwarz<sup>3,4</sup>, Steeve Boulant<sup>1,2</sup>

8

9 <sup>1</sup> Department of Infectious Diseases, Virology, University Hospital Heidelberg, Im  
10 Neuenheimer Feld 324, 69120 Heidelberg, Germany

11 <sup>2</sup> German Cancer Research Center (DKFZ), Im Neuenheimer Feld 581, 69120  
12 Heidelberg, Germany

13 <sup>3</sup> BioQuant-Center, Im Neuenheimer Feld 267, 69120 Heidelberg, Germany

14 <sup>4</sup> Institute for Theoretical Physics, Heidelberg University, Philosophenweg 19, 69120  
15 Heidelberg, Germany

16 <sup>5</sup> National Heart Lung and Blood Institute, National Institutes of Health, Bethesda,  
17 U.S.A.

18 <sup>6</sup> Department of Bioinformatics and Functional Genomics, Heidelberg University, Im  
19 Neuenheimer Feld 267, 69120 Heidelberg, Germany

20

21 \* equal contributions

22

23

24

25 Correspondence should be addressed to Steeve Boulant:

26 [s.boulant@dkfz.de](mailto:s.boulant@dkfz.de)

27

28

29 Keywords: clathrin-mediated endocytosis, clathrin-coated pits, flat clathrin lattice,  
30 CLEM, membrane curvature

## 31 **Abstract**

32 Although essential for many cellular processes, the sequence of structural and  
33 molecular events during clathrin-mediated endocytosis remains elusive. While it  
34 was believed that clathrin-coated pits grow with a constant curvature, it was  
35 recently suggested that clathrin first assembles to form a flat structure and then  
36 bends while maintaining a constant surface area. Here, we combine correlative  
37 electron and light microscopy and mathematical modelling to quantify the sequence  
38 of ultrastructural rearrangements of the clathrin coat during endocytosis in  
39 mammalian cells. We confirm that clathrin-coated structures can initially grow flat  
40 and that lattice curvature does not show a direct correlation with clathrin coat  
41 assembly. We demonstrate that curvature begins when 70% of the final clathrin  
42 content is acquired. We find that this transition is marked by a change in the clathrin  
43 to clathrin-adaptor protein AP2 ratio and that membrane tension suppresses this  
44 transition. Our results support the model that mammalian cells dynamically  
45 regulate the flat-to-curved transition in clathrin-mediated endocytosis by both  
46 biochemical and mechanical factors.

47

## 48 Introduction

49 Clathrin-mediated endocytosis (CME) is an essential uptake pathway that  
50 relocates membrane or extracellular cargo into the cell to regulate multiple cellular  
51 functions and cell homeostasis<sup>1</sup>. During CME, the clathrin coat is assembled to form  
52 a clathrin-coated pit (CCP) that after dynamin-mediated scission from the plasma  
53 membrane (PM) leads to the formation of a clathrin-coated vesicle (CCV)<sup>2</sup>. This  
54 process is coordinated by numerous adaptor and accessory proteins<sup>1,3</sup>. Electron  
55 microscopy (EM) of clathrin coated structures (CCS) has shown the architectural  
56 complexity of the clathrin meshwork organized into hexagons and pentagons<sup>4,5</sup>.  
57 From this EM analysis, it was proposed that a CCV initiates as a flat clathrin lattice  
58 that is then rearranged to form a curved CCP<sup>4,6,7</sup>. However, for topological reasons  
59 this requires a major ultrastructural rearrangement of the clathrin lattice which  
60 appeared to be dynamically difficult and energetically costly<sup>8-12</sup>. For these reasons,  
61 this notion was replaced by a general belief that CCS grow with a constant curvature  
62 (constant curvature model, Fig.1a)<sup>8,9,13</sup> and that flat CCS are distinct from CCPs and  
63 serve different purposes<sup>14-16</sup>. This model was supported by the finding that purified  
64 clathrin triskelia self-assemble into curved clathrin baskets *in vitro*<sup>17,18</sup>. Recently,  
65 correlative light and electron microscopy (CLEM) analyses provided experimental  
66 evidence that CCS first grow flat to their final size and then acquire curvature  
67 (constant area model, Fig.1a)<sup>19</sup>. However, this study did not measure the dynamics  
68 of CCP formation directly, and it did not identify the cellular factors that might  
69 determine when the flat-to-curved transition occurs. Thus a comprehensive  
70 understanding of the dynamic process of coat rearrangement, of the temporal  
71 aspects of flat-to-curved transition and of what governs this ultrastructural  
72 rearrangement during CME is still missing.

73 In this work, we combine mathematical modelling of individual endocytic  
74 event dynamics and CLEM analysis to provide a comprehensive description of the  
75 dynamic ultrastructural rearrangement of the clathrin coat during CME. We  
76 demonstrate that CCPs indeed initially grow as flat arrays, but that their  
77 reorganisation into curved structures occurs before reaching their full clathrin

78 content. We correlate this flat-to-curved transition with a change in the  
79 AP2/clathrin ratio and show that it is governed by biophysical properties of the PM.  
80 Our findings provide a unifying view of the dynamic process of coat rearrangement  
81 during CME and our approach constitutes a methodological framework to further  
82 study the fine-tuned spatio-temporal mechanism regulating coat assembly.

83

## 84 **Results**

### 85 **EM and CLEM analysis of CCS do not support existing growth models**

86

87 To address whether CCP formation follows the constant curvature model or the  
88 constant area model (Fig.1a)<sup>13</sup>, we chose BSC-1 cells, a widely used cellular model to  
89 study CME<sup>10,14,20</sup>. BSC-1 cells present homogenous CME events in regard to both  
90 lifetime as well as intensity profiles and lack the long-live flat clathrin-coated  
91 plaques<sup>10,15</sup> (Supplementary Fig.1 and Fig.1c-g). Both models predict different  
92 growth profiles for the surface and projected area during CCP formation. The  
93 constant curvature model implies that the projected area will quickly be smaller  
94 than the surface area. In contrast, the constant area model implies that both  
95 projected and surface areas initially show similar growth but then the projected  
96 area should drop significantly as bending starts (Fig.1b).

97 To comprehensively characterise the ultrastructural organisation of CCS in BSC-1  
98 cells, we performed TEM of metal replicas from unroofed PMs (Fig.1c). We  
99 confirmed that CCS are not altered by the unroofing procedure using stimulated  
100 emission depletion (STED) super-resolution microscopy of intact and unroofed cells.  
101 The number and size distribution of CCS were indeed similar between intact and  
102 unroofed cells (Supplementary Fig.2). CCS in TEM images of whole PM sheets were  
103 counted, categorised as flat, dome or pit structures (Fig.1d-e) and their size was  
104 measured as projected area (Fig.1a, f, and g). For the constant curvature model, we  
105 would expect no flat structures at all and no dome structures that exceed the  
106 projected area of pits (Fig.1a-b). In contrast our EM data reveals that around 50% of  
107 the CCS in BSC-1 correspond to flat CCS (Fig.1e) and that a large fraction of the flat  
108 and dome structures have a projected area larger than the projected area of the pits  
109 (Fig.1g). Since BSC-1 cells do not have clathrin-coated plaques<sup>10,15</sup>, these results  
110 demonstrate that the constant curvature model cannot explain the CCS size  
111 distribution, in agreement with the recent results by Avinoam et al<sup>19</sup>. Although the  
112 existence of flat CCS seems to argue in favour for the constant area model, we would  
113 expect that some flat structures have the same projected area as the surface area of

114 fully formed pits (Fig.1a-b). Since the surface area of a spherical pit ( $4\pi r^2$ , Fig.1b) is  
115 four times larger than its projected area ( $\pi r^2$ , Fig.1b), we would expect the mature  
116 flat structures to have around four times the projected area of pits (Fig.1b). Instead,  
117 we found no flat structures at all with a projected area four times larger than the  
118 mean projected area of CCP (Fig.1g). Additionally, the constant area model would  
119 imply that the projected area of dome structures (which resembles a hemisphere) is  
120 reduced by a factor of two when converting to CCP. Instead we found only a slight  
121 increase of the mean projected area of domes compared to pits (Fig.1g, distribution  
122 and inset box/whiskers). Together, these observations argue against the constant  
123 area model.

124 To further challenge the two growth models, we used a CLEM approach<sup>21,22</sup> (Fig.2a).  
125 BSC-1 cells were immunostained with a clathrin heavy chain antibody and the  
126 fluorescence intensity of CCS (Fig.2b) was correlated to their size and  
127 ultrastructural organisation measured using TEM of metal replicas (Fig.2c). For the  
128 constant curvature model, we would expect the intensity to increase with increasing  
129 contact angle (Fig.1a-b). In case of the constant area model, we would expect equal  
130 intensity for the largest flat, domes, as well as all pit structures (Fig.1a-b). However,  
131 our CLEM analysis clearly revealed that flat and dome structures have similar  
132 fluorescence intensities while pits tend to display higher fluorescence intensities  
133 (Fig.2b and d). In conclusion, our TEM and CLEM analyses argue that neither of the  
134 proposed growth models fully explains the observed ultrastructural distribution  
135 and corresponding fluorescence intensities of CCS in BSC-1 cells.

136

### 137 **Modelling of CCP assembly reveals bending of the coat before reaching** 138 **full surface area**

139

140 Although EM of metal replicas is a high-resolution microscopy technique revealing  
141 detailed information about the size and ultrastructure of CCS, it only provides  
142 snapshots of the dynamic process of CCP assembly<sup>23</sup>. In contrast, live fluorescence  
143 microscopy (FM) of CME mostly allows the characterisation of the dynamics of  
144 different proteins during the formation of CCS but does not provide ultrastructural

145 information<sup>9</sup>. To obtain a more comprehensive dynamical picture, we used  
146 mathematical modelling of clathrin growth behaviour to combine the ultrastructural  
147 information from EM with the dynamic information obtained from total internal  
148 reflection fluorescence (TIRF) microscopy of fluorescently tagged clathrin light  
149 chain (CLC). As the formation of CCS is a complex process with numerous yet  
150 unknown variables, here the modelling approach is used to combine and compare  
151 the different data sets (FM, TEM and CLEM), with minimal assumptions on the  
152 underlying mechanisms. Since we found a substantial number (around 50%) of flat  
153 CCS with projected areas similar to pits (Fig.1e and g), we rule out the possibility  
154 that the constant curvature model might be the dominant growth behaviour in BSC-  
155 1 cells. We therefore modelled the growth of flat CCS first as circular planar discs  
156 that grow to a finite size before bending (Fig.3a). Mathematically there is only one  
157 type of growth equation that can explain why growth should stop at a finite patch  
158 radius, namely association over the edge and dissociation over the area of the patch  
159 (Supplementary Information). By fitting this growth equation and assigning the  
160 three different morphologies to the individual intensity profiles obtained by TIRF  
161 microscopy (Fig.3b and Supplementary Fig.1g-i), we could calculate the size and  
162 morphology distribution of CCS as predicted by the constant area model (Fig.3c).  
163 Comparison of the calculated distribution to the acquired EM data reveals that the  
164 ratio between the flat, dome, and pit structures is biased toward flat structures  
165 compared to the EM data (Fig.3g). Additionally, the means of the predicted size  
166 distributions of flat and pit structures are clearly separated with a shift of the flat  
167 projected area towards bigger sizes (Fig.3c and i box/whiskers and Fig.3h). In  
168 agreement with our TEM and CLEM results, our mathematical modelling approach  
169 thus demonstrates that the constant area model does not correctly describe the  
170 assembly process of CCPs in BSC-1 cells.

171         Given the high proportion of flat structures (Fig.1e), we reasoned that CCS  
172 start as flat structures and then acquire curvature before reaching the full clathrin  
173 content (Fig.3d and Supplementary Information). In contrast to the patch growth  
174 model (Fig.3a), now the system has an intrinsic mechanism to stop growth, namely  
175 formation of a sphere. The patch growth is included as the initial regime. In contrast

176 to the constant curvature model, however, here we do not fix the radius of the  
177 sphere. The resulting growth equation was again fitted to the individual intensity  
178 profiles of CME events (Fig.3e) (Supplementary Information). As before, the ratio  
179 between the flat, dome, and pit structures was biased towards flat structures  
180 (Fig.3g) but now the calculated size and morphology distribution fit the EM data  
181 better than the distribution according to the constant area model. The means of the  
182 predicted projected area of both the flat and pit have similar sizes (Fig.3f and h,  
183 box/whiskers). These findings strongly support a model where assembly of a CCP  
184 initiates flat and then acquires curvature before it acquires its final clathrin content.

### 185 **Starting point of acquiring curvature is marked by a change in the** 186 **AP2/clathrin ratio**

187

188 The flat-to-curved transition of a CCS requires major ultrastructural reorganisation  
189 of the coat<sup>11</sup>. To acquire curvature, according to Euler's theorem the hexagonal  
190 organisation of the clathrin triskelia needs to reorganise into a polyhedral assembly  
191 including 12 pentagons<sup>11</sup>. The clathrin lattice in flat structures is mostly composed  
192 of hexagons<sup>4,5</sup>. Although it has been shown using FRAP that the clathrin coat is  
193 highly dynamic, which is a prerequisite for such rearrangement<sup>19,24,25</sup>, it is still  
194 puzzling what regulates the organisation of triskelia in the coat and what  
195 coordinates the flat-to-curved transition. It was proposed before that the ratio of the  
196 adaptor AP2 to clathrin changes within the growth of CCP<sup>22,26,27</sup>. Therefore, we  
197 correlated the relative amount of AP2 and the ultrastructural organisation of CCS.  
198 We performed CLEM analysis using BSC-1 cells expressing AP2 fused to GFP (Fig.4a)  
199 and correlated these results to clathrin immunostaining CLEM (Fig.4b). To find the  
200 relationship between fluorescence intensity and the surface of CCS, the measured  
201 projected area needs to be corrected for the curvature to obtain the surface area of  
202 the CCS (Fig.1b). For flat structures, projected area and surface area are identical,  
203 thus we used the linear regression of flat coats as a reference to correct the  
204 projected area of both domes and pits. Assuming the geometry of a hemisphere for  
205 domes and an almost complete sphere for pits we expect a correction factor of  $\leq 2$



206 for domes and  $2 < x \leq 4$  for pit structures if the relationship between fluorescence  
207 intensity and surface area is independent of curvature (Fig.1b). The correction  
208 factors inferred for domes and pits were 1.4 and 2.8, respectively, which are within  
209 the expected values (Fig.4d-e and Fig.1b). Strikingly, the correction factors for AP2  
210 CLEM were smaller than expected, especially for the pit structures (domes: 1.2; pits:  
211 1.7) (Fig.4c and e). This reveals that the AP2/clathrin ratio in a CCS differs  
212 depending on its curvature and that this ratio is reduced within the coat as  
213 curvature increases.

214 As the AP2/clathrin ratio depends on the curvature of CCS (Fig.4) and as AP2  
215 partitions at different nanoscale zone in relation to the edge of the clathrin lattice  
216 during the different stage of CCS formation<sup>22</sup>, we hypothesised that the change in  
217 the AP2/clathrin ratio correlates with the stage at which a flat CCS bends to form a  
218 CCP. Using cells expressing both AP2 fused to GFP and CLC fused to the fluorescent  
219 protein tdTomato, we analysed the intensity profiles of AP2 and CLC during CME.  
220 While AP2 profiles often show a distinct plateau phase, the intensity of CLC  
221 continues to increase until the end of an endocytic event (Fig.5a and Supplementary  
222 Fig.1). By normalising the fluorescence intensities of AP2 as well as CLC to the time  
223 point when the AP2 signal plateaus, we can calculate the time offset between the  
224 time AP2 signal reaches its plateau and the time point CLC reaches its maximal  
225 intensity (Fig.5a-b). Similarly, we defined the intensity offset of clathrin over AP2  
226 (Fig.5a and c). We found that the time offset was around 10s (Fig.5b) and that the  
227 intensity offset of clathrin over AP2 was around 15% (Fig.5c). We hypothesised that  
228 the time point when AP2 reaches its plateau and therefore the AP2/clathrin ratio  
229 changes marks the starting point of bending. We performed another round of CCP  
230 assembly modelling, this time using both AP2 and CLC intensity profiles and  
231 defining the time point of flat-to-curved transition when AP2 reaches its plateau  
232 phase (Fig.5e and Supplementary Information). At this precise time, the mean  
233 clathrin content reached around 70% of its maximal value (Fig.5d). Using these new  
234 parameters, the predicted ratio of flat, dome, and pit structures perfectly matched  
235 the EM data (Fig.5f) and the means of the predicted projected area of both the flat

236 and pit CCS have similar sizes (Fig.5g-h, box/whiskers and 5i). This AP2/clathrin  
237 ratio model better resembles the parameters measured in EM compared to both the  
238 constant curvature and constant area models (Fig.3h and 5i). These findings  
239 strongly support a model where flat-to-curved transition initiates at around 70% of  
240 its maximal clathrin content and correlates with the concomitant change in the  
241 AP2/clathrin ratio.

## 242 **High membrane tension inhibits the flat-to-curved transition of CCS**

243

244 By inducing curvature to the PM, the CCS needs to act against the plasma membrane  
245 tension (PMT). Higher PMT has been shown to increase the lifetime of clathrin  
246 events at the PM<sup>28,29</sup> and modelling of the energetic cost of membrane bending  
247 suggests that it affects the morphology of the CCS<sup>30,31</sup>. But the effects of increasing  
248 PMT on the ultrastructural organisation of CCS have not been investigated in living  
249 cells. We monitored the dynamics of clathrin and AP2 during osmotic shock in  
250 which the PMT was increased by applying hypotonic medium inducing osmotic  
251 swelling of the cells<sup>28</sup> (Fig.6a). Following a short latency period, we observed that  
252 CCS stalled at the PM. This effect was transient and cells quickly reverted to normal  
253 clathrin dynamics (Fig.6b and d). By performing similar modelling of CCP assembly  
254 using AP2 and CLC intensity profiles under osmotic shock, we showed that the CCS  
255 display a longer AP2 plateau phase (Fig.6c and e) and that the time offset was  
256 increased compared to mock treated cells (Fig.6f and 5b). According to our findings  
257 that the change in AP2/clathrin ratio coordinates the flat-to-curved transition of  
258 CCS, the delayed offset in the AP2/clathrin ratio under higher PMT suggests that the  
259 flat-to-curved transition is suppressed and that the coats are flat under this  
260 condition.

261 By looking at the AP2/clathrin ratio during osmotic shock we predicted that  
262 during the stalling phase, 70% of the CCS would be flat (Fig.7a). To test this notion,  
263 we performed EM of metal replica of CCS under osmotic shock (Fig.7b). We found an  
264 accumulation of flat CCS under osmotic shock compared to normal conditions and  
265 the frequency was comparable to our predictions from the AP2 and CLC profiles

266 (Fig7c). These flat structures, as well as the dome and pit structures, have the same  
267 size distribution as under normal conditions (Fig7d box/whiskers and 7e). The EM  
268 data confirms that under higher PMT the flat-to-curved transition of CCS is  
269 inhibited. Using mathematical modelling and individual clathrin and AP2 intensity  
270 profiles acquired under osmotic shock, we could predict the morphology of the  
271 stalled CCS. This validates our model describing that the change in AP2/clathrin  
272 ratio represents the precise moment at which the flat-to-curved transition occurs.  
273

## 274 Discussion

275 The complex coordination of CCS formation during CME has been  
276 investigated for decades<sup>32,33</sup> and the field has been driven by the competition  
277 between the constant curvature versus the constant area models<sup>13</sup>. Recent  
278 technological advances, in particular in CLEM, favoured the constant area model<sup>19</sup>.  
279 In this work, we implemented a multidisciplinary approach to combine information  
280 from EM, fluorescence intensity profiles of individual endocytic events and  
281 mathematical modelling of CCS growth to infer the ultrastructural rearrangement of  
282 CCS during CME.

283 By modelling the growth behaviour according to the two proposed growth  
284 models, we could calculate the expected size and morphology distribution of CCS  
285 (Fig.1 and 3). We could clearly demonstrate that neither of the proposed models  
286 explains the ultrastructural organisation and size distribution of CCS present in BSC-  
287 1 cells. Instead, our data supports a model in which CCS first grow flat and then the  
288 flat-to-curved transition occurs at around 70% clathrin content (Fig.8). Importantly,  
289 we demonstrated that this transition is directly linked to PMT and correlates with a  
290 change of the AP2/clathrin ratio within the coat. Increasing PMT results in  
291 inhibition of the change in AP2/clathrin ratio and the subsequent stalling of the  
292 ultrastructural rearrangement. Our model where a change in AP2/clathrin ratio  
293 drives the flat-to-curved transition is consistent with our recent observation that  
294 AP2 (and other adaptor/accessory proteins) partitions in different nanoscale area of  
295 the clathrin coat and that the concentration of AP2 varies within these zones at  
296 various stage of CCS assembly<sup>22</sup>.

297 Our growth behaviour of CCP assembly, determined in this work in BSC-1  
298 cells, may also apply for other cell types. To test whether our growth model could  
299 explain the ultrastructural distribution of CCS described in previous studies, we  
300 extended our mathematical model and calculated the predicted contact angle  
301 between the clathrin cage and the PM, the coated surface area and the radius of tip  
302 curvature of the CCS (Supplementary Fig.3). By comparing the model to the  
303 Avinoam et al. data<sup>19</sup> set describing the distribution and ultrastructural organization

304 of CCS in SK-MEL-2 cells, we could demonstrate that our growth model could also  
305 explain their observed distribution.

306 It was proposed earlier that the physical properties of the PM are influencing  
307 the morphology of CCS because PMT energetically acts against curvature acquisition  
308 of the clathrin array<sup>28,30,31</sup>. We demonstrated the effect of increased PMT on CCS  
309 assembly in cells. Under high PMT, the accumulation of stalled flat CCS at a stage  
310 prior of the change in AP2/clathrin ratio reveals an important step of CCP formation  
311 to overcome the PMT to acquire curvature. It is tempting to speculate that this  
312 change of AP2/clathrin ratio is a key event mandatory for curvature acquisition. The  
313 demonstrated interplay between AP2 and PMT shows that both biochemical and  
314 physical factors regulate CME. Surprisingly, the increase in PMT only changes the  
315 ratio between the different morphologies of CCS in favour of flat structures but does  
316 not affect their size. One could assume that a higher energy barrier of the PM might  
317 be counteracted by the clathrin system by the formation of larger flat CCS, which  
318 could accumulate more energy for the bending process by molecular crowding of  
319 clathrin itself as well as BAR proteins incorporated in the coat<sup>30,34-36</sup>. Since under  
320 high PMT the flat CCS still have the same size as under normal PMT we suggest that  
321 there is an internal limitation of the coat size that might be regulated by certain  
322 components of the coat. Proteins that regulate the size of CCV have been  
323 reported<sup>37,38</sup> and it might be possible that the size of a flat clathrin lattice is  
324 controlled in a similar way. The fact that other cell types show much larger flat CCS  
325 under normal conditions, commonly referred to as clathrin-coated plaques<sup>10,15</sup>,  
326 illustrates that the clathrin machinery is capable of forming large flat structures  
327 under certain conditions. But the factors necessary for clathrin-coated plaque  
328 formation have not been described so far. These clathrin-coated plaques might  
329 contribute to CME. Live-cell FM<sup>39,40</sup> and EM<sup>41</sup> of such structures support budding of  
330 CCV from such plaques most probably from the edge, again illustrating the ability of  
331 a flat CCS to rearrange into a CCP further supporting that our observed flat-to-  
332 curved transition is indeed possible.

333 We could show that during coat assembly the AP2/clathrin ratio changes.  
334 This finding is in agreement with other FM<sup>26,27,29</sup> and CLEM<sup>22</sup> studies. Mathematical

335 modelling demonstrated the correlation between the change in the AP2/clathrin  
336 ratio and the time of coat bending. Several other adaptor and accessory proteins  
337 have been proposed to influence the ultrastructure of the CCS. Depletion of FCHO 1  
338 and 2 has been reported to alter the ordered hexagonal organisation of the flat  
339 clathrin lattices<sup>42</sup>. Other proteins like CALM and NECAP have been proposed to  
340 regulate the final size off a CCV<sup>37,38</sup>.

341 Our findings provide a unifying view on the process of CCP assembly where  
342 we demonstrate that CCPs initially grow as flat lattices and that change in  
343 clathrin/adaptor ratio correlates with the onset of coat curvature acquisition prior  
344 to the completion of coat polymerization. We propose that the proportion of  
345 different coat proteins could ultimately define the morphology of a clathrin  
346 structure and temporal changes of this proportion might initiate bending of the coat,  
347 allowing for dynamical regulation by the cell.

348

## 349 **Author contributions**

350 DB and KAS performed CLEM experiments. DB performed FM experiments. FF  
351 performed modelling. DB and FF designed experiments and modelling, analysed  
352 data and wrote manuscript. KAS performed EM experiments. SK and H-GK  
353 performed STED. J-PB, WJG and KR tracked FM data. JWT designed experiments  
354 and oversaw EM and CLEM imaging. USS designed modelling, interpreted data and  
355 wrote manuscript. SB designed experiments, interpreted data and wrote  
356 manuscript.

## 357 **Acknowledgments**

358 This work was supported by a research grant from Chica and Heinz Schaller  
359 Foundation and Deutsche Forschungsgemeinschaft (DFG) in SFB1129 (Project 14)  
360 to SB. DB was supported by a fellowship of the Hartmut Hoffmann-Berling  
361 International Graduate School of Molecular & Cellular Biology (HBIGS) at the  
362 Heidelberg University and by a travel grant from Boehringer Ingelheim Fonds. FF  
363 was supported by a fellowship of the Heidelberg Graduate School of Fundamental  
364 Physics (HGSFP) at the Heidelberg University. USS and SB are members of the  
365 cluster of excellence CellNetworks. J. W. Taraska was supported by the Intramural  
366 Research Program of the National Heart Lung and Blood Institute, National  
367 Institutes of Health, USA. We would like to thank Ulrike Engel and the Nikon  
368 Imaging Center (Heidelberg University) for support with TIRF microscopy, Vibor  
369 Laketa from the Department of Infectious Diseases, Virology (University Hospital  
370 Heidelberg) for support with spinning disc microscopy, and the US National Heart  
371 Lung and Blood Institute (NHLBI) Electron Microscopy Core and Light Microscopy  
372 Core facilities for use of equipment.

373

## 374 **Methods**

### 375 **Cell lines and cell culture**

376 BSC-1 cells were obtained from ATCC. BSC-1 cells stably expressing AP2-eGFP were  
377 created by transfecting BSC-1 cells with a plasmid expressing the sigma2 subunit of  
378 AP2 fused to eGFP<sup>20</sup>. Following selection with G418 (750  $\mu$ g.mL<sup>-1</sup>) (Gibco), AP2-  
379 eGFP expressing BSC-1 cells were grown in DMEM (Gibco) supplemented with 10%  
380 fetal bovine serum, penicillin and streptomycin (Gibco) at 37  $^{\circ}$ C and 5% CO<sub>2</sub>. For  
381 passaging, cells were rinsed with PBS and incubated for 3-5 minutes with 0.05%  
382 Trypsin/EDTA (Gibco) at 37  $^{\circ}$ C and 5% CO<sub>2</sub>. After detaching, the cells were  
383 resuspended in complete medium. Passaging was done every 2-3 days in a ratio of  
384 1:5-1:10.

385

### 386 **Transfection**

387 Transfection of cells was done using Lipofectamine 2000 (Invitrogen). Cells were  
388 plated in 6-well plates one day before transfection. The next day, cells were  
389 transfected at 70-80% confluence. 2 $\mu$ g DNA and 8 $\mu$ l Lipofectamine 2000 were  
390 separately mixed with 100 $\mu$ l OptiMEM (Gibco). The two solutions were mixed  
391 together. After incubation for 20 minutes at room temperature, the transfection mix  
392 was added drop-wise onto the cells. For generation of stable cell lines, the growth  
393 medium was exchange for fresh growth medium after 8 hours. The cells were put  
394 under selection two days after transfection.

395 For live-cell imaging of BSC-1 AP2-eGFP transiently expressing CLCa-tdtomato were  
396 seeded 8 hours after transfection.

397

### 398 **Antibodies and Plasmids**

399 Anti-clathrin heavy chain antibody (X22, ab2731, 1:500 for immunofluorescence)  
400 was purchased from Abcam. Anti-clathrin light chain antibody (Con.1, C1985, 1:500  
401 for immunofluorescence) was purchased from Sigma-Aldrich. Secondary Alexa



402 Fluor 647 goat anti-mouse (1:1,000 for immunofluorescence) and goat anti-mouse  
403 Atto594 (1:200 for immunofluorescence) were purchased from molecular probes.  
404 Wheat Germ Agglutinin AlexaFluor 647 conjugate (W32466, 1:200 for  
405 immunofluorescence) was purchased from molecular probes.  
406 Mammalian expression vectors containing rat CLCa N-terminally fused to  
407 tdtomato<sup>43</sup> and the rat AP2 subunit sigma2 C-terminally fused to eGFP<sup>20</sup> were used  
408 for stable and transient expression of fluorescently tagged proteins.

409

### 410 **Live-cell microscopy**

411 Glass coverslips (TH. Geyer, 25mm diameter, No. 1.5H) were coated with poly-D-  
412 lysine solution (Sigma-Aldrich, #P6407) at concentration 0.1mg ml<sup>-1</sup> for 5 minutes  
413 at room temperature and washed three times with PBS. Cells were seeded on poly-  
414 D-lysine-coated coverslips and live-cell microscopy was performed 12-16 hours  
415 after seeding. Live-cell imaging of AP2-eGFP was performed with an inverted  
416 spinning-disk confocal microscope (PerkinElmer), with a 60x (1.42 numerical  
417 aperture, Apo TIRF, Nikon) or 100x (1.4 numerical aperture, Plan Apo VC, Nikon) oil  
418 immersion objective and a CMOS camera (Hamamatsu Ocras Flash 4). An  
419 environment control chamber was attached to the microscope to keep 37 °C and  
420 5%CO<sub>2</sub>. 10 minutes-long movies of representative cells were taken with one frame  
421 every 3 seconds. Live-cell imaging of AP2-eGFP together with CLCa-tdtomato was  
422 performed with an inverted Ti microscope (Nikon) with objective TIRF illumination,  
423 with a 60x (1.49 numerical aperture, Apo TIRF, Nikon) oil immersion objective and  
424 EMCCD camera (Andor iXon Ultra DU-897U). An on-stage incubation chamber was  
425 used to keep 37 °C and 5%CO<sub>2</sub>. 10 minutes-long movies of representative cells  
426 were taken with one frame every 3 seconds.

427

### 428 **Osmotic shock experiments**

429 For live-cell microscopy of cells under osmotic shock, one cell was imaged for 5  
430 minutes under normal conditions. Afterwards the medium was change to hypotonic

431 medium (1:1 ratio of medium to water with 10% FBS) and the same cell was imaged  
432 for an additional 30 minutes. For TEM of cells under osmotic shock, cells were put  
433 into hypotonic medium and unroofed after 10 minutes of osmotic shock. The  
434 samples were then prepared for TEM.

435

### 436 **Unroofing**

437 Cells were seeded on poly-D-lysine-coated coverslips (25mm). Unroofing was  
438 performed 16 hours after seeding. Cells were washed three times with stabilisation  
439 buffer (30mM HEPES buffer, brought to pH 7.4 with KOH, 70mM KCl, 5mM MgCl<sub>2</sub>).  
440 Unroofing was performed in 2% paraformaldehyde in stabilisation buffer using two  
441 short sonication pulses. Sample was immediately put into fresh 2%  
442 paraformaldehyde solution and fixed for 20 minutes at room temperature.

443

### 444 **Immunofluorescence**

445 For immunofluorescence, intact cells growing on poly-D-lysine coated 12mm  
446 coverslips (#1.5, Thermo Scientific) or unroofed PMs were fixed with 2-4%  
447 paraformaldehyde for 20 minutes at room temperature. Intact cell were  
448 permeabilised with 0.5% Triton X in PBS for 15 minutes. After blocking with PBS  
449 1% BSA for 1 hour at room temperature, samples were incubated with primary  
450 antibody diluted in PBS with 1% BSA for 1 hour at room temperature. After five  
451 washes with PBS, samples were incubated with the secondary antibody. Wheat  
452 germ agglutinin diluted in 1% BSA in PBS was incubated on cells for 30 minutes at  
453 room temperature. After five washes with PBS, samples for STED were mounted  
454 using Mowiol and samples for correlative light and electron microscopy were fixed  
455 by incubation with 2% paraformaldehyde for 20 minutes at room temperature and  
456 washed three times with PBS.

457

## 458 **Imaging of unroofed PMs for CLEM**

459 Widefield fluorescent images of unroofed PMs were taken with a Nikon N-STORM  
460 microscope with a 100x oil immersion objective and an EMCCD camera (Andor Ixon  
461 Ultra DU-897). To cover an area of 1mm<sup>2</sup> a montage of 15x15 images with an  
462 overlap of 15% for stitching was taken. The imaged area was marked with a circle  
463 (4mm in diameter) around the centre of the imaged area using an objective  
464 diamond scribe. The immersion oil was carefully removed from the bottom of the  
465 glass coverslip and the sample was prepared for EM.

466

## 467 **TEM of metal replica**

468 Coverslips with unroofed membranes were fixed with 2% glutaraldehyde in PBS  
469 overnight. Samples were incubated with 0.1% tannic acid for 20 minutes at room  
470 temperature. After four washes with water, the samples were incubated with 0.1%  
471 uranyl acetate for 20 minutes at room temperature. After two washes with water,  
472 samples were dehydrated with a series of ethanol solutions (15%-100%). Samples  
473 were placed in each ethanol solution for 5 minutes. After replacing the 100%  
474 ethanol solution, the samples were dried in a critical point dryer. The samples  
475 were then put under vacuum until they were coated. The samples were coated with  
476 JFDV JOEL Freeze Fracture Equipment with a first layer of platinum with an angle of  
477 17° while rotating and with a second layer of carbon with an angle of 90° while  
478 rotating. For better orientation, the marked area of the coated samples was imaged  
479 with a phase contrast microscope. The samples were then cut to fit on the EM grids  
480 (TED PELLA, 75 Mesh Copper, Support Films Formvar/Carbon). 5% hydrofluoric  
481 acid was used to remove glass from the metal replica. The floating metal replica was  
482 extensively washed with water and the carefully placed on a glow discharged EM  
483 grid. Samples were dried on filter paper and again imaged with a phase contrast  
484 microscope. TEM imaging was performed using a JEOL 1400 equipped with  
485 SerialEM freeware for montaging. Montages of large membrane sheets at 12,000  
486 magnification (1.82nm per pixel) with 10% overlap were imaged.

487

## 488 **Transformation of images for CLEM**

489 The fluorescence microscopy image and the electron microscopy montage of the  
490 same membrane sheet were first manually and roughly overlaid using Photoshop.  
491 MATLAB was used to transform the fluorescence image according to the electron  
492 microscopy montage using three manually identified CCS. For the transformation  
493 the centre of the clathrin structure in the electron microscope montage and the  
494 centre of the fluorescence signal determined by a Gaussian fit were used as  
495 landmarks.

496

## 497 **Tracking**

498 For tracking CME events, we used ilastik (<http://ilastik.org>). First the images were  
499 segmented using the pixel classification and object classification workflow. For  
500 tracking, the automatic tracking workflow was used. The maximal distance was put  
501 to 5 to avoid merging of close tracks. Automatic tracking of CCS using AP2-eGFP  
502 expressing BSC-1 cells was performed using a probabilistic particle tracking  
503 method<sup>44</sup>. The method combines Kalman filters with particle filters and probabilistic  
504 data association with elliptical sampling (PDAE). For particle detection, a Laplacian-  
505 of-Gaussian filter and connected-component labelling was used. Based on the  
506 computed trajectories, the signal intensity of each tracked object (normalized to the  
507 background intensity) was determined and intensity statistics over all trajectories  
508 were computed. Also, the object size was determined for each time. In addition, the  
509 lifetime of CCS was quantified and classified into different ranges.

510

## 511 **STED**

512 STED nanoscopy was carried out using the Two-color-STED system (Abberior  
513 Instruments GmbH, Göttingen). Image acquisition was performed using a 100x  
514 Olympus UPlanSApo (NA 1.4) oil immersion objective and 70 % nominal STED laser  
515 power ( $\lambda = 775$  nm, max. power = 1.2 W). Line accumulation was set to 4 and a pixel  
516 size of 15 nm was used. Deconvolution of acquired images was done using

517 impector software (Abberior Instruments GmbH, Göttingen). Richardson-Lucy  
518 deconvolution with a regularisation parameter of 0.001 was used and stopped after  
519 30 iterations.  
520

## 521 **Supplementary Information**

### 522 **Constant area model**

523 As the fluorescence intensity of labelled clathrin triskelia is proportional to the  
524 number of incorporated clathrin triskelia or equivalently to the size of clathrin  
525 covered membrane area, we model the assembly of CCV as surface growth.

526 Our mathematical description of the constant area model considers finite growth of  
527 a flat circular patch with radius  $r$ . The flat patch grows at its edge ( $L$ ) with rate  $k_{\text{on}}$   
528 but decays over the bulk with rate  $k_{\text{off}}$ , which can be expressed by  $\frac{dA}{dt} = k_{\text{on}}L -$   
529  $k_{\text{off}}A$ . In (Fig. 3a) a sketch of the growth schematics is shown. The growth equation  
530 can be simplified by plugging in the surface of a circular patch  $A = \pi r^2$ , it follows  
531  $\frac{dr}{dt} = k_{\text{on}} - k_{\text{off}}\frac{r}{2}$  with steady state radius  $r_{\text{ss}} = 2k_{\text{on}}/k_{\text{off}}$ . By integrating this  
532 equation, we find the patch area as a function of time

533

$$534 A(t) = \pi \left( r_{\text{ss}} \left( 1 - e^{-(k_{\text{off}}/2)t} \right) \right)^2.$$

535

536 In the observed fluorescence intensity tracks the intensity decreases after some  
537 time until the intensity vanishes completely. Biologically, this indicates that the  
538 clathrin coated vesicle pinches off the cell membrane and therefore, moves out of  
539 the focus of the microscope. We model this by assuming an exponential decay of the  
540 area with time constant  $\tau$ , starting at time  $t_{\text{decrease}}$

$$541 A(t) = \begin{cases} \pi \left( r_{\text{ss}} \left( 1 - e^{-(k_{\text{off}}/2)t} \right) \right)^2 & t \leq t_{\text{decrease}}, \\ \pi \left( r_{\text{ss}} \left( 1 - e^{-(k_{\text{off}}/2)t_{\text{decrease}}} \right) \right)^2 e^{-t/\tau} & t > t_{\text{decrease}}. \end{cases} \quad (\text{Eq. S1})$$

542 As the steady state is only reached approximately we define an area plateau at 95%  
543 of the steady state area and the corresponding time  $t_{\text{plateau}}$ . The constant area  
544 model assumes that a flat patch transforms into a spherical pit as soon as the patch  
545 reaches the area plateau. Here, we neglect the exact details of the transformation  
546 process but classify the CCS as flat, dome (less than a half sphere) or pit according to

547 time. Before reaching the plateau, the area is considered flat. After reaching the  
548 plateau we classify CCS in the first 40% of the remaining time until  $t_{\text{decrease}}$  to be  
549 domes and in the last 60% of time to be pits. The exact choice is motivated by the  
550 occurrences of domes and pits in EM which is roughly 2:3.

## 551 **Data fits**

552 To test whether the constant area model correctly describes the shape and size of  
553 clathrin coated vesicles we fitted Eq. 1 to 4927 FM tracks of 4 different cells (Fig. 3b)  
554 and calculated from the fitted area surface growth curves histograms which we  
555 could compare to EM histograms. Therefore, we related the intensity of an FM track  
556 to its corresponding area. Furthermore, the FM dataset was filtered before the  
557 fitting. The exact details of our procedure are described in the following.

## 558 **Relate fluorescence intensity and surface area by means of** 559 **CLEM**

560 To relate the fluorescence intensity of a clathrin FM track to the corresponding  
561 clathrin covered membrane area we use our clathrin CLEM data, relating the  
562 projected surface size of CCS to their fluorescence intensity. We analyse flat CCS for  
563 which the projected area directly corresponds to their surface. By fitting a line  
564 through the origin to the clathrin CLEM data we get the slope  $\beta$  providing us with a  
565 linear relation between size and intensity. As the local intensity background is  
566 removed from the CLEM data we find

$$567 \quad I(A) = \beta A, \text{ (Eq. S2)}$$

568 where  $I$  is the intensity of the FM data,  $A$  is the area of the clathrin structure and  $\beta$  is  
569 the proportionality constant. Fig. 4b shows the intensity of flat structures as a  
570 function of their projected area (blue). We find  $\beta = 4085 \text{ nm}^2$ .

## 571 **Relate different FM datasets**

572 To calculate a size histogram from fluorescence intensity tracks we analyse live cell  
573 FM data, that have a different intensity level than the fluorescence intensity of the  
574 CLEM data. Therefore, we need to relate these two different data sets. As the CLEM  
575 intensity  $I$  and the live cell FM intensity  $I'$  are both proportional to the number of  
576 labelled clathrin triskelia, both intensities, which are background corrected, can be  
577 related only by some factor  $\alpha$

$$578 \quad I' = \alpha I \rightarrow \alpha = \langle I' \rangle / \langle I \rangle, \text{ (Eq. S3)}$$

579 which can be calculated by dividing the means (indicated by  $\langle \rangle$ ) of both data sets.

## 580 **Relate different FM datasets**

581 We next restricted the live cell FM data set to ensure that the calculated size  
582 histogram is comparable to the EM histogram. In EM we only detect structures that  
583 reach a threshold size. However, in the live cell FM data set we register only  
584 detectable intensities, which exceed the local background signal. Therefore, we  
585 relate the minimal detectable size in CLEM ( $A_T$ ) to a threshold intensity ( $I_T$ ), which  
586 we relate to a threshold intensity ( $I'_T$ ) that we use on the live cell FM tracks. As  $I' =$   
587  $\alpha I$  we find

$$588 \quad \frac{\langle I' \rangle - \langle I'_T \rangle}{\langle I' \rangle} = \frac{\langle I \rangle - \langle I_T \rangle}{\langle I \rangle}$$

589 As  $\langle I' \rangle$  is a function of  $\langle I'_T \rangle$  we can find the root of

$$590 \quad 0 = I_T \frac{\langle I' \rangle}{\langle I \rangle} - I'_T$$

591 by iteratively increasing  $\langle I'_T \rangle$ .

592 In EM we find that the minimal sized clathrin structure has an area of  $A_T =$   
593  $5644 \text{ nm}^2$ , corresponding to a calculated intensity of  $I_T = 2.305 \cdot 10^7 \text{ arb. unit}$ . We  
594 find the mean intensity in the clathrin CLEM data of all structures  $\langle I \rangle = 1.766 \cdot$   
595  $10^8 \text{ arb. unit}$ . To measure the mean intensity in the live cell FM data set we sample  
596 from each FM track that lasts a least 24 seconds a number of intensities  
597 proportional to its lifetime. From these sampled intensities, which we restrict to be



598 larger than the threshold value  $I'_T$ , we then compute the mean intensity. We obtain  
599  $I'_T = 5.450 \cdot 10^3$  arb. unit,  $\langle I' \rangle = 4.148 \cdot 10^4$  arb. unit. By combining the Eq. S2 and Eq.  
600 S3 we finally arrive at

$$601 \quad A'(I') = \frac{I'}{\alpha\beta}$$

602 according to which we compute the surface of a clathrin structure from its intensity  
603 in the live cell FM. Furthermore, we filter all FM tracks showing a mean intensity  
604 which is smaller than  $I'_T$ , as those tracks would not be observable in EM.

## 605 **Data filtering**

606 To ensure that all structures correspond to real objects we assume for a productive  
607 object a minimal lifetime of 24 seconds. We filter our data set for FM tracks with  
608 multiple structures (defined as a FM track that shows at least two clear intensity  
609 maxima) to allow for direct fitting of single tracks. Furthermore, we filter tracks that  
610 start already with a medium intensity level  $I'(t = 0) > 0.5\langle I' \rangle$ .

## 611 **Parameter choice and data fitting**

612 The parameters for the fit are restricted by assuming that growth curves should at  
613 least reach 90% and at most 120% of the maximal area value. Additionally, we  
614 assume that vesicle pinch off (corresponding to a decrease in the intensity to 10%)  
615 takes between 10 seconds to 20 seconds. Additionally, we require the fit to reach  
616 99% of the steady state area before the area decrease happens and at least 10% of  
617 that time until the 99% area level are reached. We implement the Python module  
618 'Imfit' for fitting the area tracks where we use the method 'nelder' of the minimiser  
619 function. In this way we obtain for each track four parameters ( $r_{ss}$ ,  $k_{off}$ ,  $\tau$ ,  $t_{decrease}$ )  
620 that characterise the growth curve.

## 621 Calculation of the size histogram

622 From the growth curves, we calculated a histogram (Fig. 3c) to compare the  
623 constant area model to the measured projected size EM histogram (Fig. 3h). We  
624 proceeded as follows:

- 625 • From each of the fitted growth curves we uniformly drew a number of time  
626 points, proportional to the time until the structure pinches off the cell membrane,  
627 that is given by  $t_{\text{decrease}}$  (Fig. 3a and b). We used 4927 FM tracks of 4 different  
628 cells giving us 4 million time points, which we used to calculate the size  
629 histogram.
- 630 • We classified the chosen times and corresponding areas into three categories. If  
631  $t < t_{\text{plateau}}$  the structure is flat (blue region in Fig. 3b). We assume that the  
632 transformation process from flat to dome takes 40% of the plateau time (which  
633 corresponds roughly to the ratio between domes and pits in EM) whereas from  
634 dome to pit it takes 60%. This is supported by the notion that the clathrin array  
635 reorganisation becomes increasingly complicated. Therefore, if  $t_{\text{plateau}} < t <$   
636  $t_{\text{plateau}} + \frac{2}{5}(t_{\text{decrease}} - t_{\text{plateau}})$  the structure is a dome (red region in Fig. 3B) and  
637 otherwise it is classified as a pit (green region in Fig. 3b).
- 638 • We computed the projected area by assuming that the transformation within the  
639 dome and pit phase is a linear function of time. Therefore, we divided the area by  
640  $1 + \frac{5}{2} \frac{t - t_{\text{plateau}}}{t_{\text{decrease}} - t_{\text{plateau}}}$  for domes and  $2 + \frac{5}{3} \frac{t - t_{\text{plateau}} - \frac{2}{5}(t_{\text{decrease}} - t_{\text{plateau}})}{t_{\text{decrease}} - t_{\text{plateau}}}$  for pits. This  
641 factor equals 1 for a flat patch, 2 for a completed dome (half sphere) and 4 for a  
642 completed pit (full sphere).
- 643 • We excluded times for which the corresponding area is below the area threshold  
644 or where the area already decreases (white region in Fig. 3b).
- 645 • From the calculated projected areas, we then determined the size histogram (Fig.  
646 3c), which we compare to the EM data (Fig. 3h).

## 647 **Curvature acquisition during growth: updated model**

648 In the updated growth model we assume that CCS first grow flat, start to invaginate  
649 as they reach 70 % of their final size (which we determine by taking the inverse of  
650 the intensity ratio of pit and flat structures in clathrin CLEM, which is 1.44) and  
651 finally grow as a spherical cap until a full pit has formed. As before we model the  
652 assembly of clathrin coated vesicles as surface growth.

653 Our mathematical description of the “curvature acquisition during growth  
654 model “ considers a spherical cap with radius  $R$  that grows at its edge with rate  $k_{on}$   
655 which can be expressed by  $\frac{dA}{dt} = k_{on}L$ . In (Fig. 3d) a sketch of the growth schematics  
656 is shown. The growth equation can be simplified by plugging in the surface of a  
657 spherical cap  $A = 2\pi R^2(1 - \cos(\varphi))$ , such that the change in the angle  $\frac{d\varphi}{dt} = \frac{k_{on}}{R}$  is  
658 constant. In the limit of a small growth angle  $\varphi = k_{on}t/R < 1$  we recover the growth  
659 equation of a flat patch  $A(t) = \pi(k_{on}t)^2$ . For an almost complete pit the growth  
660 equation also holds perfectly. However, the mathematical description of the growth  
661 model approximates the flat patch by a spherical cap for intermediate flat patch  
662 sizes. In this case, the error is negligible as the model interpolates between the  
663 correctly addressed limiting cases and is not used to assign the shape of the CCS.

664 To define the ultrastructural organization of the clathrin lattice, we neglect,  
665 as before, the exact details of the transformation process but classify the CCS as flat,  
666 dome (less than a half sphere) or pit according to time relative to the time when  
667 reaching the maximal area. Before reaching 70% of the maximal area the coat is flat.  
668 After reaching 70% of the maximal area we classify CCS in the first 40% of the  
669 remaining time to be domes and pits otherwise. The exact choice is motivated by the  
670 occurrences of domes and pits in EM which is roughly 2:3.

671 As before we model that vesicles pinch off the membrane by an exponential  
672 decay of the area with time constant  $\tau$ , starting at time  $t_{decrease} = \pi R/k_{on}$ . The full  
673 growth equation for the area as a function of time  $A(t)$  reads

674

$$675 \quad A(t) = \begin{cases} 2\pi R^2 \left(1 - \cos\left(\frac{k_{\text{on}} t}{R}\right)\right) & t < \frac{\pi R}{k_{\text{on}}}, \\ 4\pi R^2 e^{-t/\tau} & t > \frac{\pi R}{k_{\text{on}}}. \end{cases} \quad (\text{Eq. S4})$$

## 676 **Data fits, parameter choice and data fitting**

677 To test whether the “curvature acquisition during growth” model correctly  
678 describes the shape and size of clathrin coated vesicles we fitted Eq. S4 to 4927 FM  
679 tracks of 4 different cells (Fig. 3e) and calculated from the fitted area surface growth  
680 curves histograms which we could compare to EM histograms. Therefore, we  
681 related the intensity of an FM track to its corresponding area. Furthermore, the FM  
682 dataset was filtered before the fitting. The exact details of our procedure are the  
683 same as before.

684 The parameters for the fit are restricted by assuming that growth curve  
685 should at least reach 90% and maximal 120% of the maximal area value and that  
686 the vesicle pinching off (corresponding to a decrease in the intensity to 10%) takes  
687 between 10 seconds to 20 seconds. We implement the Python module ‘lmfit’ for  
688 fitting the area tracks where we use the method ‘nelder’ of the minimiser function.  
689 In this way we obtain for each track 4 parameters ( $R, k_{\text{off}}, \tau,$ ) that characterise the  
690 growth curve.

## 691 **Calculation of the size histogram**

692 From the growth curves we calculated a histogram (Fig. 3f) to compare “the  
693 curvature acquisition during growth model” to the measured projected size EM  
694 histogram (Fig. 3h). We proceeded in principle as before and only mention changes:

695

- 696 • We classified the chosen times (around 4 million time points) and corresponding  
697 areas into three categories. If  $A(t) < 0.7A_{\text{max}}$  the structure is flat (blue region in  
698 Fig. 3e) and we call this time  $t_{\text{transformation}}$ . We assume that the transformation  
699 process from flat to dome takes the first 40% of the remaining time until the

700 maximal area is reached (which corresponds roughly to the ratio between domes  
701 and pits in EM) whereas from dome to pit it takes the rest of the time.

702 • We computed the projected area by assuming that the transformation within the  
703 dome and pit phase is a linear function of time. Therefore, we divided the area by

704  $1 + \frac{5}{2} \frac{t - t_{\text{transformation}}}{t_{\text{decrease}} - t_{\text{transformation}}}$  for domes and  $2 +$

705  $\frac{5}{3} \frac{t - t_{\text{transformation}} - \frac{2}{5}(t_{\text{decrease}} - t_{\text{transformation}})}{t_{\text{transformation}} - t_{\text{plateau}}}$  for pits. This factor equals 1 for a flat

706 patch, 2 for a completed dome (half sphere) and 4 for a completed pit (full  
707 sphere).

## 708 **Curvature acquisition during growth: Flat-to-curved** 709 **transition corroborates with the change of clathrin/AP2** 710 **ratio**

711 Here, the only thing that changes compared to the updated model is that the  
712 transition time  $t_{\text{transformation}}$  is now given by the time when the AP2 intensity  
713 plateaus, which we calculated by fitting eq. 1 to the AP2 FM intensity tracks.

714

## 715 **Live cell FM analysis resampling**

716 To determine the ratio of clathrin and AP2 during the process of CME, we  
717 performed TIRF microscopy of BSC-1 AP2-eGFP cells transiently expressing CLCa-  
718 tdtomato. We analysed the excess of clathrin in comparison with AP2 during the  
719 formation of CCVs. Therefore, we calculated the ratio of the maximum clathrin  
720 intensity divided by the intensity of clathrin at the time when AP2 shows an  
721 intensity plateau (95% intensity level) and subtract this ratio from the ratio, which  
722 we get for AP2.

723 In detail: we set a threshold for the AP2 intensity underneath fluorescence  
724 intensity tracks are excluded (as before). We calculate the plateau time, defined as  
725 the time when 95% of the AP2 plateau intensity is reached by fitting the constant

726 area model to the AP2 FM data. Additionally, we normalise all intensity values to the  
727 intensity value when 95% of the AP2 intensity (clathrin intensity) is reached. For  
728 each track (in total 754 tracks of one single cell) we calculate the difference of the  
729 time when AP2 plateaus and clathrin reach the maximum intensity and determine  
730 the corresponding histogram (cf. Fig 5b). Furthermore, we calculate the intensity  
731 offset given by the normalised maximum clathrin intensity divided by the  
732 normalised maximum AP2 intensity (cf. Fig. 5c).

### 733 **Calculation of the ratio histogram during the osmotic** 734 **shock**

735 To determine the ratio histogram of flat, dome and pit CCS during the  
736 osmotic shock (Fig. 7a and 7c) we first defined a transition time  $t_{\text{transformation}}$ , when  
737 flat CCS start to invaginate, where the normalised clathrin intensity exceeds the  
738 normalised AP2 intensity by 5% (blue region in Fig. 6c). We assumed that the  
739 transformation process from flat to dome takes the first 40% of the remaining time  
740 until the vesicle pinches of the PM, given by  $t_{\text{decrease}}$  (red region in Fig. 6c) whereas  
741 from dome to pit it takes the remaining 60% of time (green region in Fig. 6c). Next,  
742 we started 50s after the osmotic shock and determined the morphology of all tracks  
743 present at that time depending on the description above. We repeated this  
744 procedure in steps of 5 seconds and average the number of structures over time  
745 intervals of 100 seconds. In total we used 1356 FM tracks of one cell. The found  
746 ratios of flat, dome and pit CCS were then plotted as a function of the time after the  
747 osmotic shock (Fig. 7a).

748 To test the consistency of this approach we used it to calculate the ratios for  
749 flat, dome and pit structures on the data without osmotic shock consisting of 4927  
750 FM tracks of 4 different cells. Averaging over all tracks and considering only tracks  
751 with lifetimes shorter than 90s and with AP2/clathrin discrepancy we obtained  
752 47.8% flat CCS, 18.0% dome CCS and 34.2% pit CCS which is close to the determined  
753 ratios in (Fig. 5g).

## 754 **Quantification of agreement between measured and** 755 **predicted size histograms**

756 To determine the level of agreement between measured (Fig. 3h) and  
757 predicted size histograms (Fig. 3c, Fig. 3f and Fig. 5e) we calculated chi-squared

758  $\chi_j^2 = \sum_{i=1}^k \frac{(N_{ij} - np_{ij})^2}{np_{ij}}$  where we sum over all bins  $k$  the occurrences  $N_i$  of measured CCS

759 and compared it with the number of expected occurrences  $np_i$ , where  $p_i$  is the  
760 predicted normalised frequency per bin, which we deduced from our models

761 (CAM=constant are model, UM=updated model and AP2=transition flat/dome  
762 determined by the time when the AP2 intensity plateaus) and  $n = \sum N_i$ . We repeated

763 this for all CCS  $j = \{flat, dome, pit\}$  such that we found three values for  $\chi_j^2$  for each  
764 model and cell. We averaged these values for all CCS and four cells and found:

765  $\chi_{CAM}^2 = 1018$ ,  $\chi_{UM}^2 = 649$  and  $\chi_{AP2}^2 = 632$  which shows that the model plotted in  
766 Fig. 5e describes the data best.

767 Additionally, we performed a Welch's t-test to calculate p-values for the null  
768 hypothesis that the measured and predicted size distributions of a CCS have  
769 identical mean values. We averaged over all CCS and four cells and found  $p_{CAM} =$   
770  $0.60$ ,  $p_{UM} = 0.75$  and  $p_{CAM} = 0.78$ .

771

## 772 **References**

- 773 1. McMahon, H. T. & Boucrot, E. Molecular mechanism and physiological  
774 functions of clathrin-mediated endocytosis. *Nat. Rev. Mol. Cell Biol.* **12**, 517–33  
775 (2011).
- 776 2. Ferguson, S. M. & De Camilli, P. Dynamin, a membrane-remodelling GTPase.  
777 *Nat Rev Mol Cell Biol* **13**, 75–88 (2012).
- 778 3. Taylor, M. J., Perrais, D. & Merrifield, C. J. A High Precision Survey of the  
779 Molecular Dynamics of Mammalian Clathrin-Mediated Endocytosis. *PLoS Biol.*  
780 **9**, e1000604 (2011).
- 781 4. Heuser, J. Three-dimensional visualization of coated vesicle formation in  
782 fibroblasts. *J. Cell Biol.* **84**, 560–583 (1980).
- 783 5. Maupin, P. & Pollard, T. D. Improved preservation and staining of HeLa cell  
784 actin filaments, clathrin-coated membranes, and other cytoplasmic structures  
785 by tannic acid-glutaraldehyde-saponin fixation. *J. Cell Biol.* **96**, 51–62 (1983).
- 786 6. Larkin, J. M., Donzell, W. C. & Anderson, R. G. W. Potassium-dependent  
787 Assembly of Coated Pits: New Coated Pits Form as Planar Clathrin Lattices. *J.*  
788 *Cell Biol.* **103**, 2619–2627 (1986).
- 789 7. Heuser, J. E. & Anderson, R. G. W. Hypertonic Media Inhibit Receptor-mediated  
790 Endocytosis by Blocking Clathrin-coated Pit Formation. *J. Cell Biol.* **108**, 389–  
791 400 (1989).
- 792 8. Kirchhausen, T. Coated pits and coated vesicles — sorting it all out. *Curr. Opin.*  
793 *Struct. Biol.* **3**, 182–188 (1993).
- 794 9. Kirchhausen, T. Imaging endocytic clathrin structures in living cells. *Trends*  
795 *Cell Biol.* **19**, 596–605 (2009).
- 796 10. Saffarian, S., Cocucci, E. & Kirchhausen, T. Distinct dynamics of endocytic  
797 clathrin-coated pits and coated plaques. *PLoS Biol.* **7**, e1000191 (2009).
- 798 11. den Otter, W. K. & Briels, W. J. The Generation of Curved Clathrin Coats from  
799 Flat Plaques. *Traffic* **12**, 1407–1416 (2011).
- 800 12. Kumar, G. & Sain, A. Shape transitions during clathrin-induced endocytosis.



- 801           *Phys. Rev. E* **94**, 62404 (2016).
- 802   13.   Lampe, M., Vassilopoulos, S. & Merrifield, C. Clathrin coated pits, plaques and  
803           adhesion. *J. Struct. Biol.* **196**, 48–56 (2016).
- 804   14.   Boucrot, E., Saffarian, S., Massol, R., Kirchhausen, T. & Ehrlich, M. Role of lipids  
805           and actin in the formation of clathrin-coated pits. *Exp. Cell Res.* **312**, 4036–48  
806           (2006).
- 807   15.   Grove, J. *et al.* Flat clathrin lattices: stable features of the plasma membrane.  
808           *Mol. Biol. Cell* **25**, 3581–3594 (2014).
- 809   16.   Vassilopoulos, S. *et al.* Actin scaffolding by clathrin heavy chain is required for  
810           skeletal muscle sarcomere organization. *J. Cell Biol.* **205**, 377–93 (2014).
- 811   17.   Kirchhausen, T. & Harrison, S. C. Protein organization in clathrin trimers. *Cell*  
812           **23**, 755–761 (1981).
- 813   18.   Pearse, B. M. & Robinson, M. S. Purification and properties of 100-kd proteins  
814           from coated vesicles and their reconstitution with clathrin. *EMBO J.* **3**, 1951–  
815           1957 (1984).
- 816   19.   Avinoam, O., Schorb, M., Beese, C. J., Briggs, J. A. G. & Kaksonen, M. Endocytic  
817           sites mature by continuous bending and remodeling of the clathrin coat.  
818           *Science* **348**, 1369 LP-1372 (2015).
- 819   20.   Ehrlich, M. *et al.* Endocytosis by random initiation and stabilization of  
820           clathrin-coated pits. *Cell* **118**, 591–605 (2004).
- 821   21.   Sochacki, K. A., Shtengel, G., van Engelenburg, S. B., Hess, H. F. & Taraska, J. W.  
822           Correlative super-resolution fluorescence and metal-replica transmission  
823           electron microscopy. *Nat Meth* **11**, 305–308 (2014).
- 824   22.   Sochacki, K. A., Dickey, A. M., Strub, M.-P. & Taraska, J. W. Endocytic proteins  
825           are partitioned at the edge of the clathrin lattice in mammalian cells. *Nat Cell*  
826           *Biol* **19**, 352–361 (2017).
- 827   23.   Higgins, M. K. & McMahon, H. T. Snap-shots of clathrin-mediated endocytosis.  
828           *Trends Biochem. Sci.* **27**, 257–263 (2017).
- 829   24.   Wu, X. *et al.* Clathrin exchange during clathrin-mediated endocytosis. *J. Cell*  
830           *Biol.* **155**, 291 LP-300 (2001).
- 831   25.   Wu, X. *et al.* Adaptor and Clathrin Exchange at the Plasma Membrane and

- 832 trans-Golgi Network. *Mol. Biol. Cell* **14**, 516–528 (2003).
- 833 26. Saffarian, S. & Kirchhausen, T. Differential Evanesence Nanometry : Live-Cell  
834 Fluorescence Measurements with 10-nm Axial Resolution on the Plasma  
835 Membrane. *Biophys. J.* **94**, 2333–2342 (2008).
- 836 27. Loerke, D., Mettlen, M., Schmid, S. L. & Danuser, G. Measuring the Hierarchy of  
837 Molecular Events During Clathrin-Mediated Endocytosis. *Traffic* **12**, 815–825  
838 (2011).
- 839 28. Boulant, S., Kural, C., Zeeh, J.-C., Ubelmann, F. & Kirchhausen, T. Actin  
840 dynamics counteract membrane tension during clathrin-mediated  
841 endocytosis. *Nat Cell Biol* **13**, 1124–1131 (2011).
- 842 29. Ferguson, J. P. *et al.* Deciphering dynamics of clathrin-mediated endocytosis in  
843 a living organism. *J. Cell Biol.* **214**, 347 LP-358 (2016).
- 844 30. Saleem, M. *et al.* A balance between membrane elasticity and polymerization  
845 energy sets the shape of spherical clathrin coats. *Nat. Commun.* **6**, 6249  
846 (2015).
- 847 31. Hassinger, J. E., Oster, G., Drubin, D. G. & Rangamani, P. Design principles for  
848 robust vesiculation in clathrin-mediated endocytosis. *Proc. Natl. Acad. Sci.*  
849 **114**, E1118–E1127 (2017).
- 850 32. Robinson, M. S. Forty Years of Clathrin-coated Vesicles. *Traffic* **16**, 1210–1238  
851 (2015).
- 852 33. Maib, H., Smythe, E. & Ayscough, K. Forty years on: clathrin-coated pits  
853 continue to fascinate. *Mol. Biol. Cell* **28**, 843–847 (2017).
- 854 34. Rao, Y. & Haucke, V. Membrane shaping by the Bin/amphiphysin/Rvs (BAR)  
855 domain protein superfamily. *Cell. Mol. Life Sci.* **68**, 3983–3993 (2011).
- 856 35. Stachowiak, J. C. *et al.* Membrane bending by protein–protein crowding. *Nat*  
857 *Cell Biol* **14**, 944–949 (2012).
- 858 36. Mim, C. & Unger, V. M. Membrane curvature and its generation by BAR  
859 proteins. *Trends Biochem. Sci.* **37**, 526–533 (2017).
- 860 37. Ritter, B. *et al.* NECAP 1 regulates AP-2 interactions to control vesicle size,  
861 number, and cargo during clathrin-mediated endocytosis. *PLoS Biol.* **11**,  
862 e1001670 (2013).

- 863 38. Miller, S. E. *et al.* CALM Regulates Clathrin-Coated Vesicle Size and Maturation  
864 by Directly Sensing and Driving Membrane Curvature. *Dev. Cell* **33**, 163–175  
865 (2015).
- 866 39. Merrifield, C. J., Perrais, D. & Zenisek, D. Coupling between clathrin-coated-pit  
867 invagination, cortactin recruitment, and membrane scission observed in live  
868 cells. *Cell* **121**, 593–606 (2005).
- 869 40. Li, D. *et al.* Extended-resolution structured illumination imaging of endocytic  
870 and cytoskeletal dynamics. *Science* **349**, (2015).
- 871 41. Heuser, J. E., Arnende, L. M., Branch, E. & Diseases, K. Deep-Etch Visualization  
872 of 27S Clathrin: A Tetrahedral Tetramer. *J. Cell Biol.* **105**, 1999–2009 (1987).
- 873 42. Umasankar, P. K. *et al.* A clathrin coat assembly role for the muniscin protein  
874 central linker revealed by TALEN-mediated gene editing. *Elife* **3**, e04137  
875 (2014).
- 876 43. Cureton, D. K., Massol, R. H., Saffarian, S., Kirchhausen, T. L. & Whelan, S. P. J.  
877 Vesicular Stomatitis Virus Enters Cells through Vesicles Incompletely Coated  
878 with Clathrin That Depend upon Actin for Internalization. *PLoS Pathog.* **5**,  
879 e1000394 (2009).
- 880 44. Godinez, W. J. & Rohr, K. Tracking Multiple Particles in Fluorescence Time-  
881 Lapse Microscopy Images via Probabilistic Data Association. *IEEE Trans Med*  
882 *Imaging* **34**, 415–432 (2015).
- 883

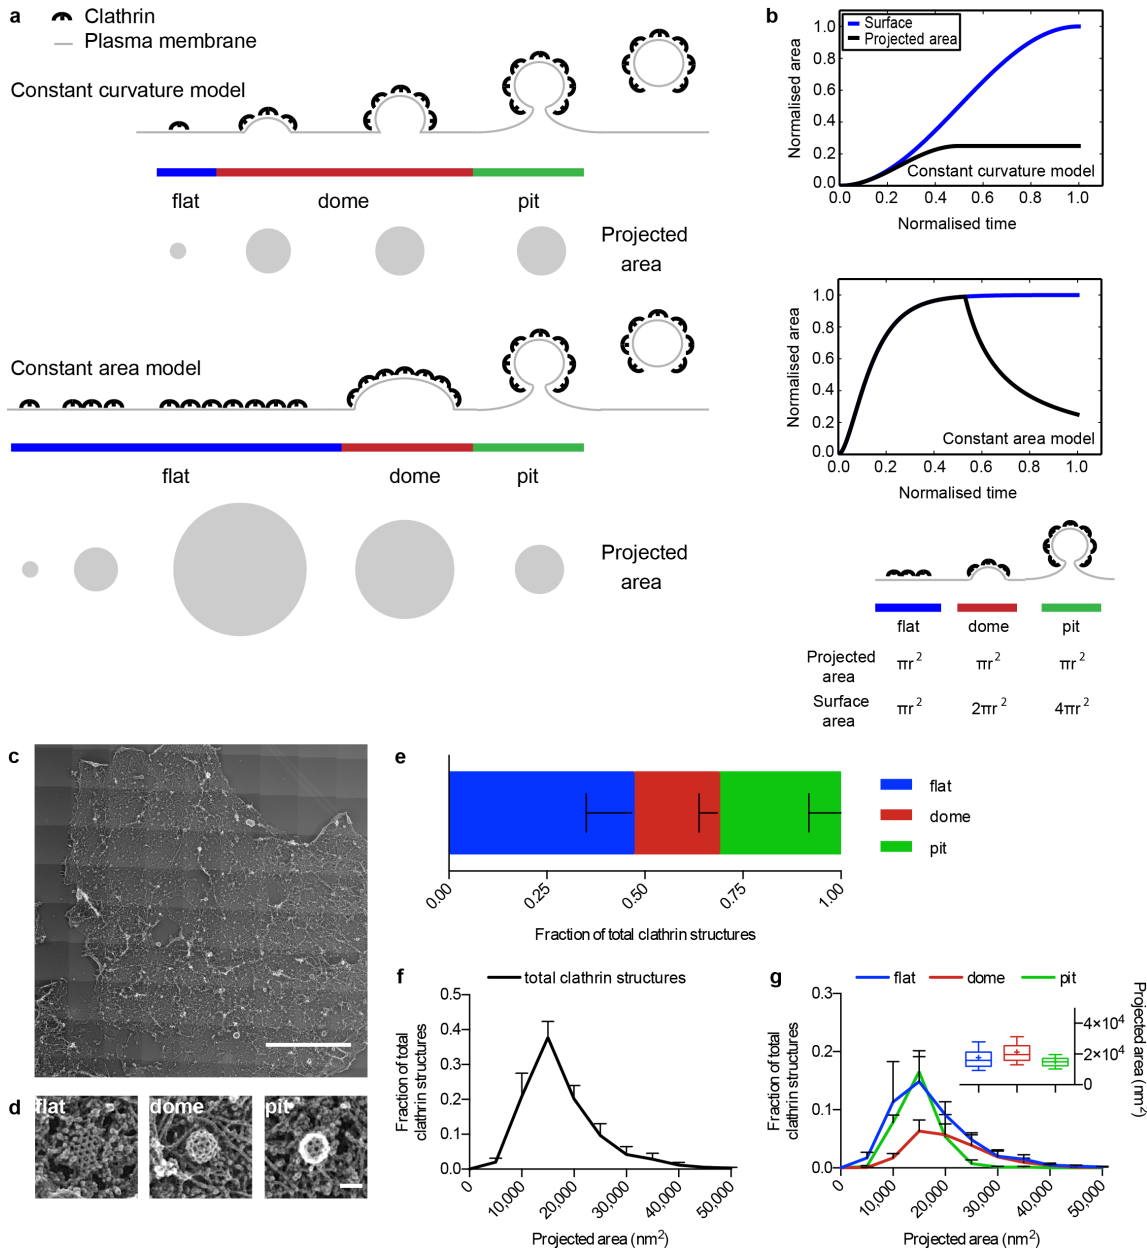

884

885

886 **Figure 1: Comprehensive ultrastructural characterisation of CCS in BSC-1 cells**

887 **by TEM.** (a) Schematic of the constant curvature and constant area models. The

888 stages of different curvature (flat (blue), dome (red), pit (green)) and the variation

889 of projected area, which can be assessed during TEM imaging, is depicted for both

890 growth models. (b) Difference between projected area (black) and surface area

891 (blue) during the course of CCP formation according to the two models. The

892 schematic illustrates the relationship between projected area and surface area for

893 flat, dome (approximately a hemisphere), and pit (approximately a complete  
894 sphere) CCS. (c) TEM of metal replica from unroofed PM, overview of whole  
895 membrane, scale bar: 10 $\mu$ m. (d) Examples of flat, dome, and pit structures, scale bar:  
896 100nm. (e) Fraction of flat (blue), dome (red) and pit (green) CCS in whole PM of  
897 BSC-1 cell. (f) Projected area distribution of all CCS (black) measured by TEM. (g)  
898 Projected area distribution of the different clathrin morphologies (flat, dome, pit). A  
899 box/whiskers plot of the projected area is shown in the inset. Mid-line represents  
900 median, cross represents the mean and the whiskers represent the 10 and 90  
901 percentiles. Results are calculated from three different membranes (number of CCS  
902 per membrane: 746, 869, and 739); means with SD are shown.  
903

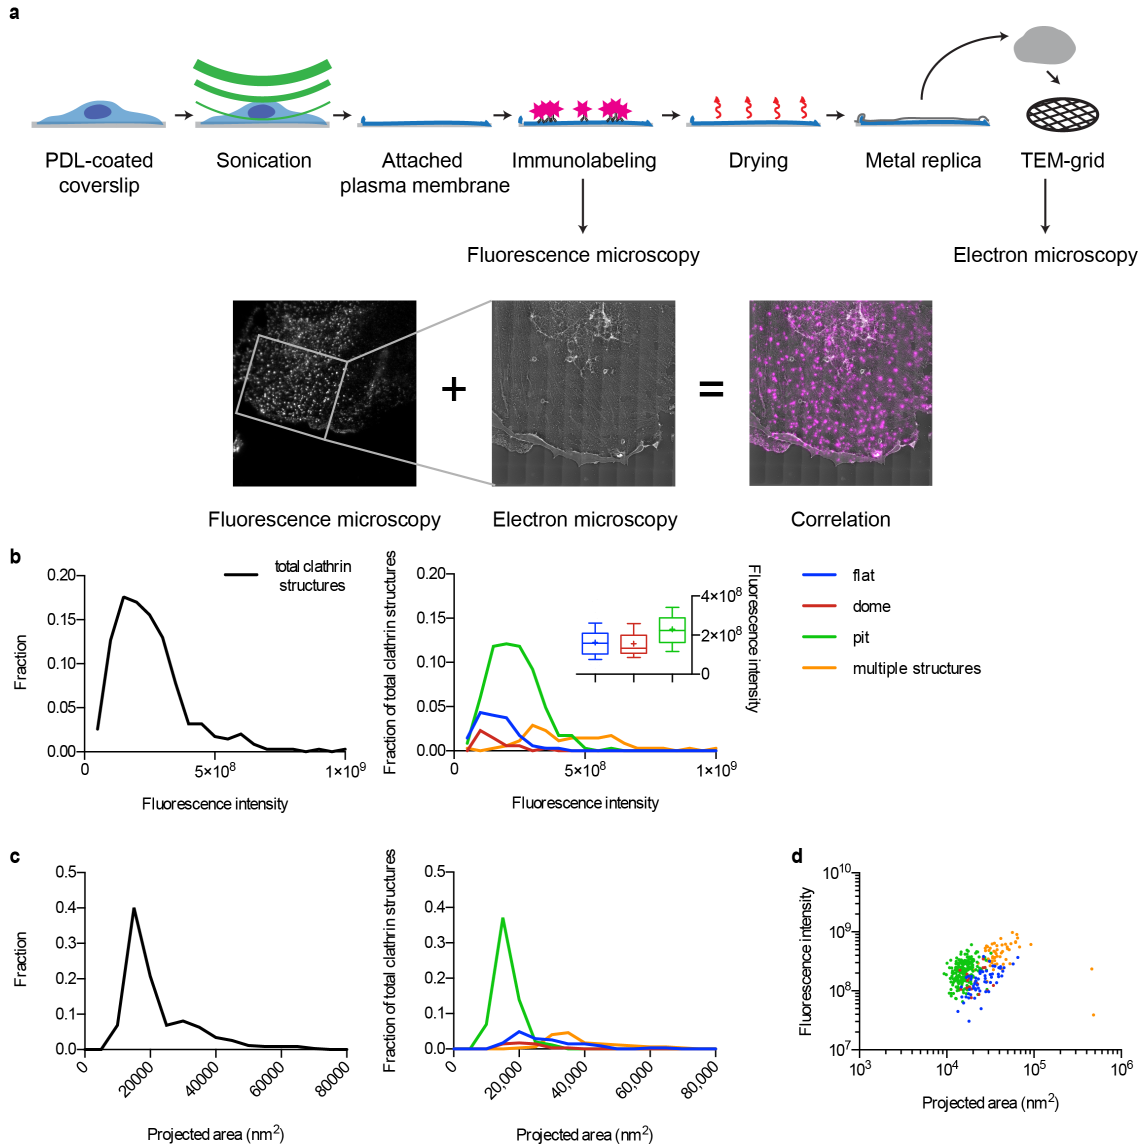

904

905

906 **Figure 2: CLEM of CCS.** (a) Schematic representation of the CLEM approach (Upper

907 part). Cells growing on poly-D-lysine (PDL)-coated coverslips were unroofed by

908 sonication. Attached PMs were immunostained and imaged using FM. Samples were

909 then critical-point dried and the metal replica was created and lifted from the

910 sample onto a TEM grid for imaging in TEM. (Lower part) The FM and EM pictures

911 were then correlated to combine their information (See methods). Unroofed PMs

912 were immunostained using an anti-clathrin heavy chains antibody. The white inset

913 box represents the area observed by TEM. (b) Fluorescence intensity distribution

914 (clathrin heavy chain antibody, X22) of all CCS (black line, left panel) and of flat

915 (blue), dome (red), pit (green) CCS, and multiple structures which cannot be

916 distinguished by fluorescence microscopy (orange) (right panel). A box/whiskers  
917 plot of the fluorescence intensity is shown in the inset. Mid-line represents median,  
918 cross represents the mean and the whiskers represent the 10 and 90 percentiles. (c)  
919 Projected area distribution of all CCS (black line, left panel) and of the different  
920 clathrin morphologies (right panel). (d) Correlation of size and fluorescence  
921 intensity of all CCS sorted by their different morphologies. Graphs show one  
922 representative CLEM result with a total of 347 CCS from one PM.

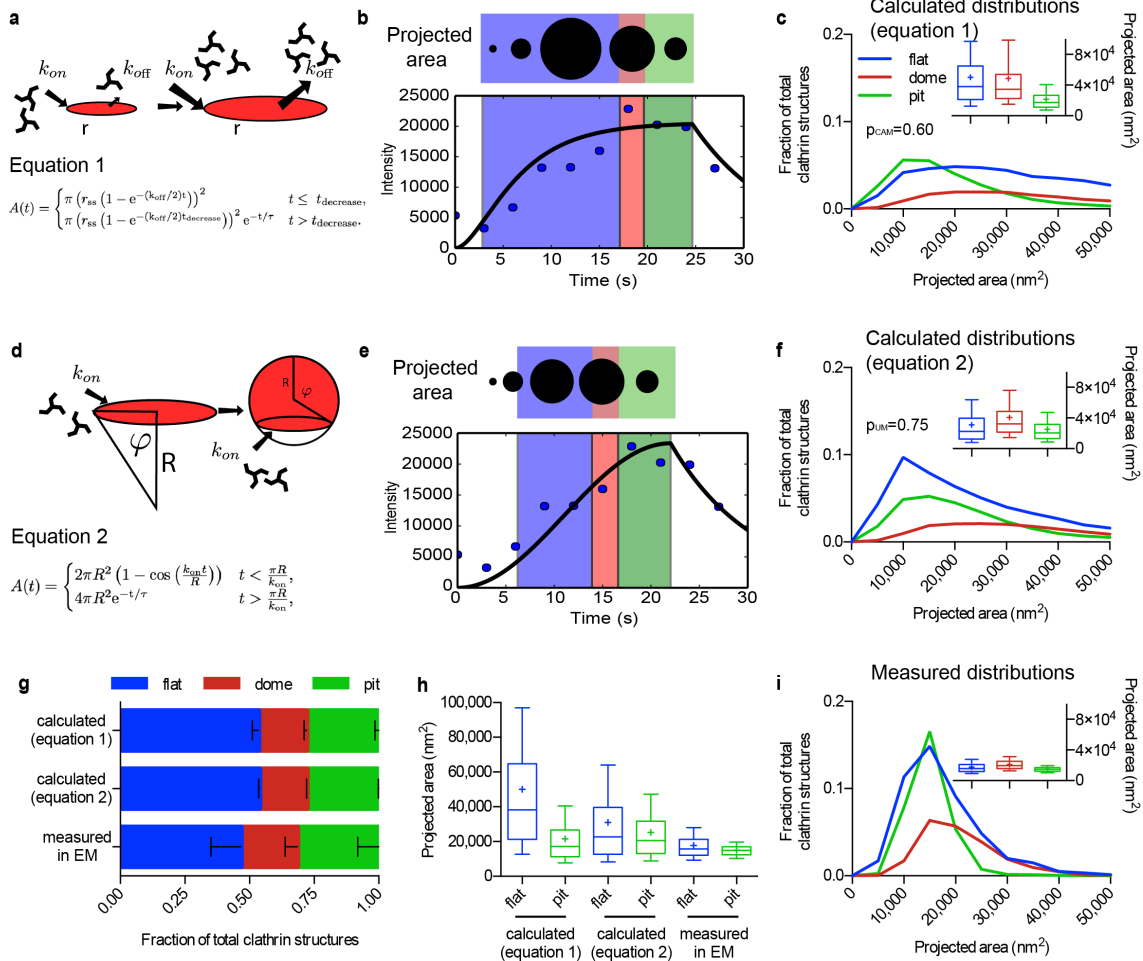

923

924 **Figure 3: Mathematical modelling of CCS growth from intensity profiles of**  
 925 **individual CME events.** (a) Mathematical representation of the constant area  
 926 model, flat-to-curved transition happens at the time when clathrin reaches its final  
 927 content. (b) Example of a clathrin intensity track fitted by the constant area model.  
 928 Blue dots represent measured intensity of a single CME event; black line represents  
 929 the fit with equation 1. The schematic illustrates the calculated size and curvature,  
 930 flat (blue), dome (red), and pit (green). (c) Calculated projected area and curvature  
 931 distributions of the CCS according to the constant area model for 4927 FM tracks of  
 932 4 different cells. P-value of Welch's t-test to compare the predicted to the measured  
 933 distribution in panel h. A box/whiskers plot of the projected area is shown in the  
 934 inset. Mid-line represents median, cross represents the mean and the whiskers  
 935 represent the 10 and 90 percentiles. (d) Mathematical representation of the updated  
 936 growth model where a flat clathrin patch grows and the flat-to-curved transition



937 happens before reaching the final clathrin content. (e and f) same as (b and c) but  
938 using equation 2. (g) Comparison of the predicted ratio of flat, dome, and pit  
939 structures from both growth model (equation 1 (a) and equation 2 (d)) and the  
940 distribution obtained from TEM imaging. Results are calculated for 4927 FM tracks  
941 of 4 different cells; means with SD are shown. (h) Direct comparison of the projected  
942 area distribution of flat and pit structures calculated by equation 1 and 2 as well as  
943 measured in EM, box/whiskers plot. (i) Measured projected area and curvature  
944 distributions of the CCS from TEM data as shown in Fig. 1.  
945

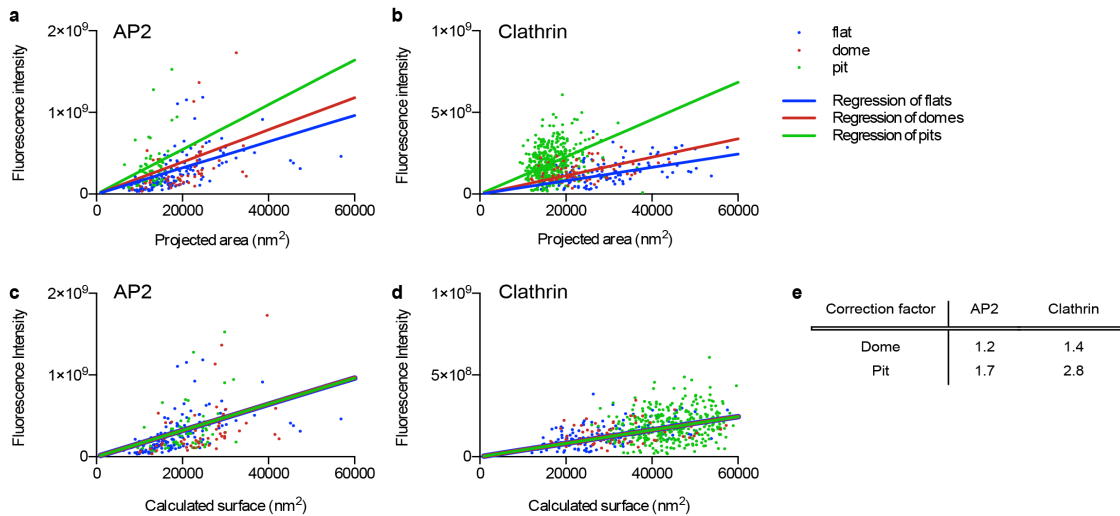

946  
947

948 **Figure 4: The relative amount of AP2 and clathrin molecules per surface unit**  
949 **of a CCS is curvature dependent.** CLEM analysis of CCS labelled with AP2-eGFP (a)  
950 or clathrin heavy chain antibody (b). Flat (blue), dome (red), and pit (green). Lines  
951 in the corresponding colour show linear regression of the projected area and of the  
952 fluorescence intensity. CLEM analysis of CCS corrected according to the regression  
953 of flat structures labelled with AP2-eGFP (c) or clathrin heavy chain antibody (d).  
954 Projected areas of dome and pit structures of the CLEM analysis were multiplied by  
955 a correction factor to fit the linear regression of flat CCS. Lines in the corresponding  
956 colour show linear regression of the calculated surface and the fluorescence  
957 intensity. (e) Table shows correction factors for dome and pit structures for AP2-  
958 eGFP or clathrin heavy chain labelling used in (c) and (d).

959

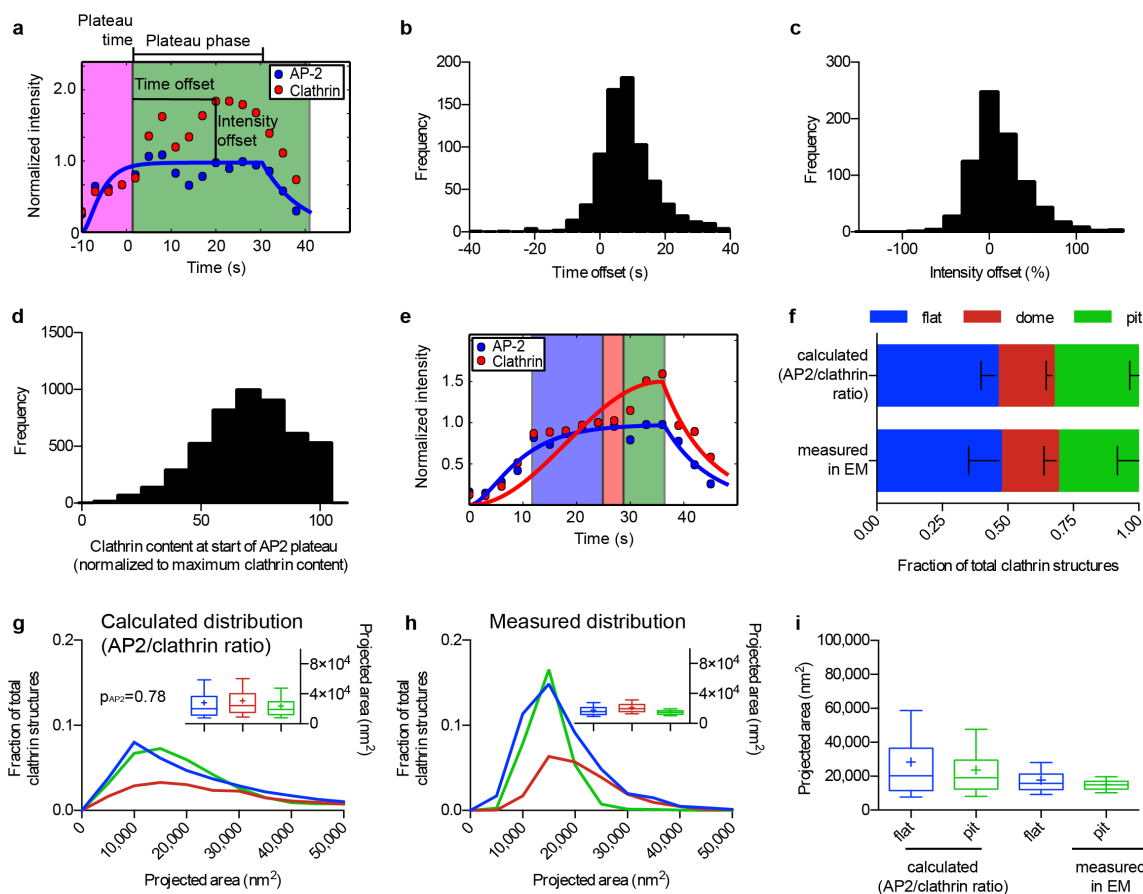

960

961

962 **Figure 5: Change in the AP2/clathrin ratio is associated with flat-to-curved**

963 **transition.** (a) Example of an AP2 (blue) and clathrin (red) intensity profile from an

964 individual CME event. The AP2 profile was fitted to equation 1 to find the time when

965 AP2 signal plateaus. For more information see Supplementary Information. The

966 fluorescence intensity of AP2 and clathrin were normalised to the fluorescence

967 intensity of the time when the fitted AP2 profile reaches its plateau. Time offset

968 (difference between the time AP2 plateaus and clathrin reaches its maximum

969 intensity) and intensity offset (excess of maximal clathrin signal over AP2 maximum

970 intensity) are indicated in the profiles. Quantification of the time offset (b) and the

971 intensity offset (c) for 754 tracks of one single cell. (d) Quantification of the clathrin

972 content at the time when AP2 reaches its plateau from 4927 FM tracks. The clathrin

973 signal was normalised to the maximal clathrin signal in each track. (e) Example of an

974 AP2 (blue) and clathrin (red) profile fitted to equation 1 and 2, respectively. These

975 fits were used to calculate the size and curvature distributions of the CCS in (f and

976 g). For more information see Supplementary Information. (f) Comparison of the  
977 calculated ratio of flat, dome, and pit structures to the measured ratio in TEM.  
978 Results calculated from 4927 FM tracks from 4 different cells; means with SD are  
979 shown. (g) Calculated projected area of the CCS using a growth model where the  
980 flat-to-curved transition corroborates with the change of clathrin/AP2 ratio (when  
981 AP2 signal reaches its plateau phase) for 4927 FM tracks of 4 different cells. P-value  
982 of Welch's t-test to compare the predicted to the measured distribution in panel f. A  
983 box/whiskers plot of the projected area is shown in the inset. (h) Measured  
984 projected area and curvature distributions of the CCS from TEM data as shown in  
985 Fig.1. A box/whiskers plot of the projected area is shown in the inset. (i) Direct  
986 comparison of the projected area distribution of flat and pit structures calculated  
987 according to the AP2/clathrin ratio as well as measured in EM, box/whiskers plot.  
988

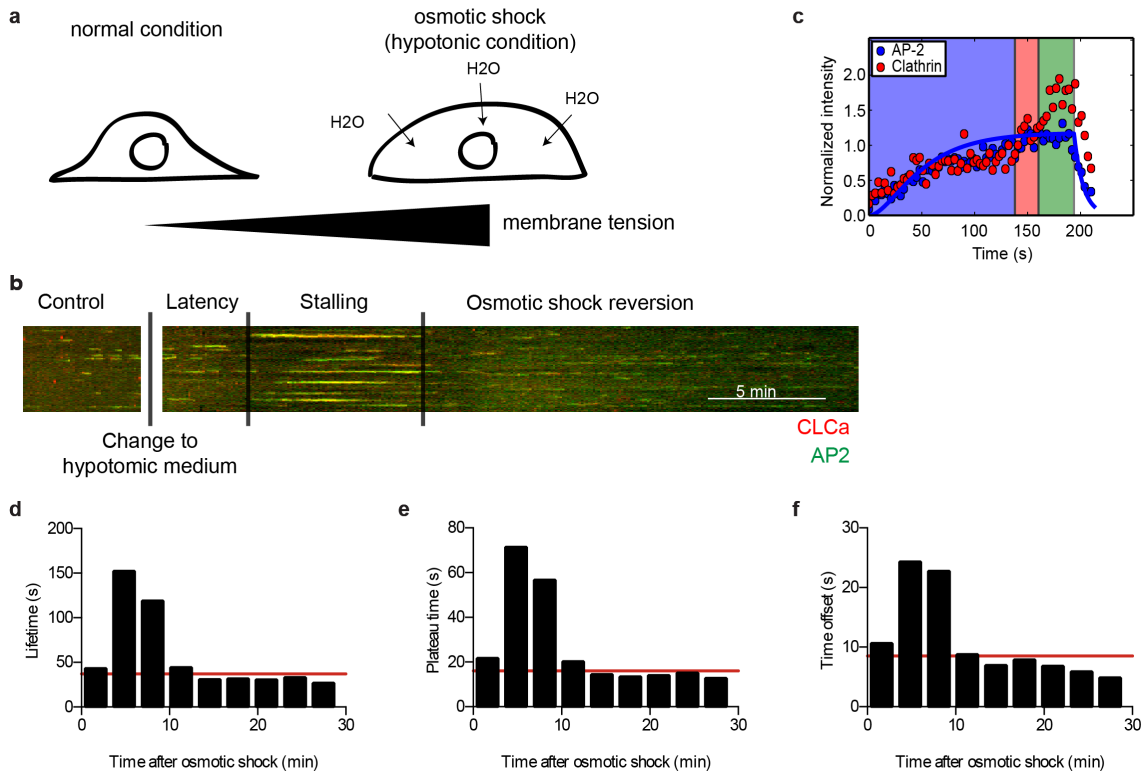

989

990

991 **Figure 6: Osmotic shock induces stalling of CCS.** (a) Illustration of the effect of

992 osmotic shock on BSC-1 cells. Hypotonic medium was applied to BSC-1 cells,

993 inducing osmotic swelling that results in an increase in PMT. The same BSC-1

994 expressing fluorescently tagged clathrin light chain and AP2 proteins was followed

995 from 5 minutes prior (internal control) until 30 minutes post hypotonic medium

996 application using spinning disc confocal microscopy. (b) Kymograph of AP2-eGFP

997 (green) and clathrin light chain a-tdtomato (red) expressing BSC-1 cells. The

998 dynamics of CCP was recorded during 5 min prior to osmotic shock until 30 minutes

999 post-osmotic shock. The time after applying the hypotonic medium can be divided

1000 into latency, stalling, and osmotic shock reversion time depending on the effect on

1001 CME dynamics. Scale bar: 5 minutes. (c) Representative AP2 (blue) and clathrin

1002 (red) intensity profile from an individual CME event during the time of stalling fitted

1003 to equation 1 to quantify the plateau time. (d) Quantification of the lifetime of CME

1004 events during osmotic shock experiments for 1607 tracks of one single cell. CME

1005 events were binned in 3 min intervals in respect to the onset of osmotic shock. Red

1006 line indicates lifetime of CME prior to osmotic shock. (e) Quantification of the

1007 plateau time of AP2 of individual CME events during osmotic shock experiments (as  
1008 defined in Fig.5a) for 1607 tracks of one single cell. CME events were binned in 3  
1009 min intervals in respect to the onset of osmotic shock. Red line indicates plateau  
1010 time of CME prior to osmotic shock. (f) Quantification of the time offset between  
1011 AP2 plateau and clathrin maximum of individual CME events during osmotic shock  
1012 experiments (as defined in Fig.5a) for 1607 tracks of one single cell. CME events  
1013 were binned in 3 min intervals in respect to the onset of osmotic shock. Red line  
1014 indicates time offset of CME prior to osmotic shock.  
1015

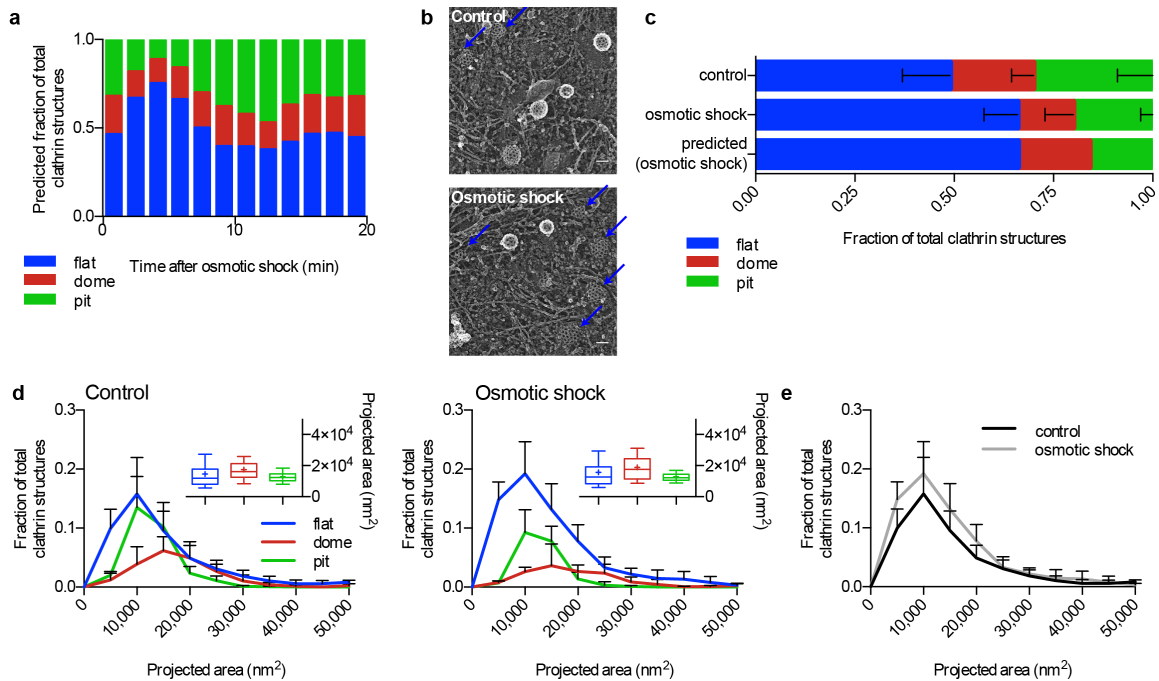

1016

1017

1018

**Figure 7: Osmotic shock blocks flat-to-curved transition of CCS.** (a) Predicted

1019

ratio of flat (blue), dome (red), and pit (green) structures calculated from the

1020

binned AP2 and clathrin profiles of CME events (Fig.6c) during osmotic shock for

1021

1357 tracks. (b) Examples of CCS under normal and osmotic shock conditions.

1022

Blue arrows point to flat structures. (c) Comparison of measured and predicted

1023

frequency of flat, dome, and pit structures under normal and osmotic shock

1024

conditions. (d) Projected area distribution of the different clathrin morphologies

1025

under normal and osmotic shock conditions. A box /whiskers plot of the

1026

projected area is shown in the inset. Mid-line represents median, cross represents

1027

the mean and the whiskers represent the 10 and 90 percentiles. (e) Comparison

1028

of projected area distributions of flat CCS under normal and osmotic shock

1029

conditions. Results are calculated from four different membranes (number of CCS

1030

per membrane: normal conditions 267, 308, 229, and 323; osmotic shock: 395,

1031

99, 351, and 201); means with SD are shown.

1032

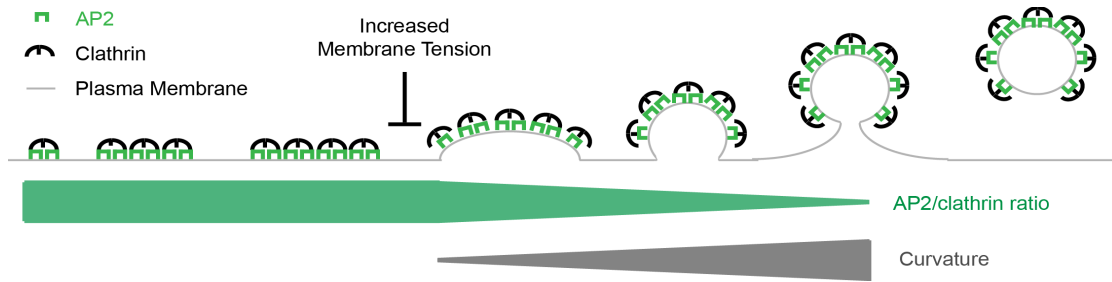

1033

1034 **Figure 8: Model of CCP assembly.** Schematic representation of the growth model  
1035 of CCS. CCS initiate as flat clathrin array. They first grow in size in a flat morphology  
1036 with a constant AP2/clathrin ratio. When they reach around 70% of their full  
1037 clathrin content, the AP2/clathrin ratio starts to decrease and the CCS start  
1038 acquiring their curvature. CCPs keep growing by adding additional clathrin  
1039 molecules until formation and release of CCV into the cytoplasm. The flat-to-curved  
1040 transition of CCS can be inhibited by increasing PMT resulting in an accumulation of  
1041 flat structures. We propose that flat-to-curved transition is concomitant with  
1042 bypassing the energy barrier necessary to curve the PM and that this critical step in  
1043 CME is coordinated by the uncoupling of clathrin and AP2 characterised by their  
1044 abrupt ratio decrease.

1045



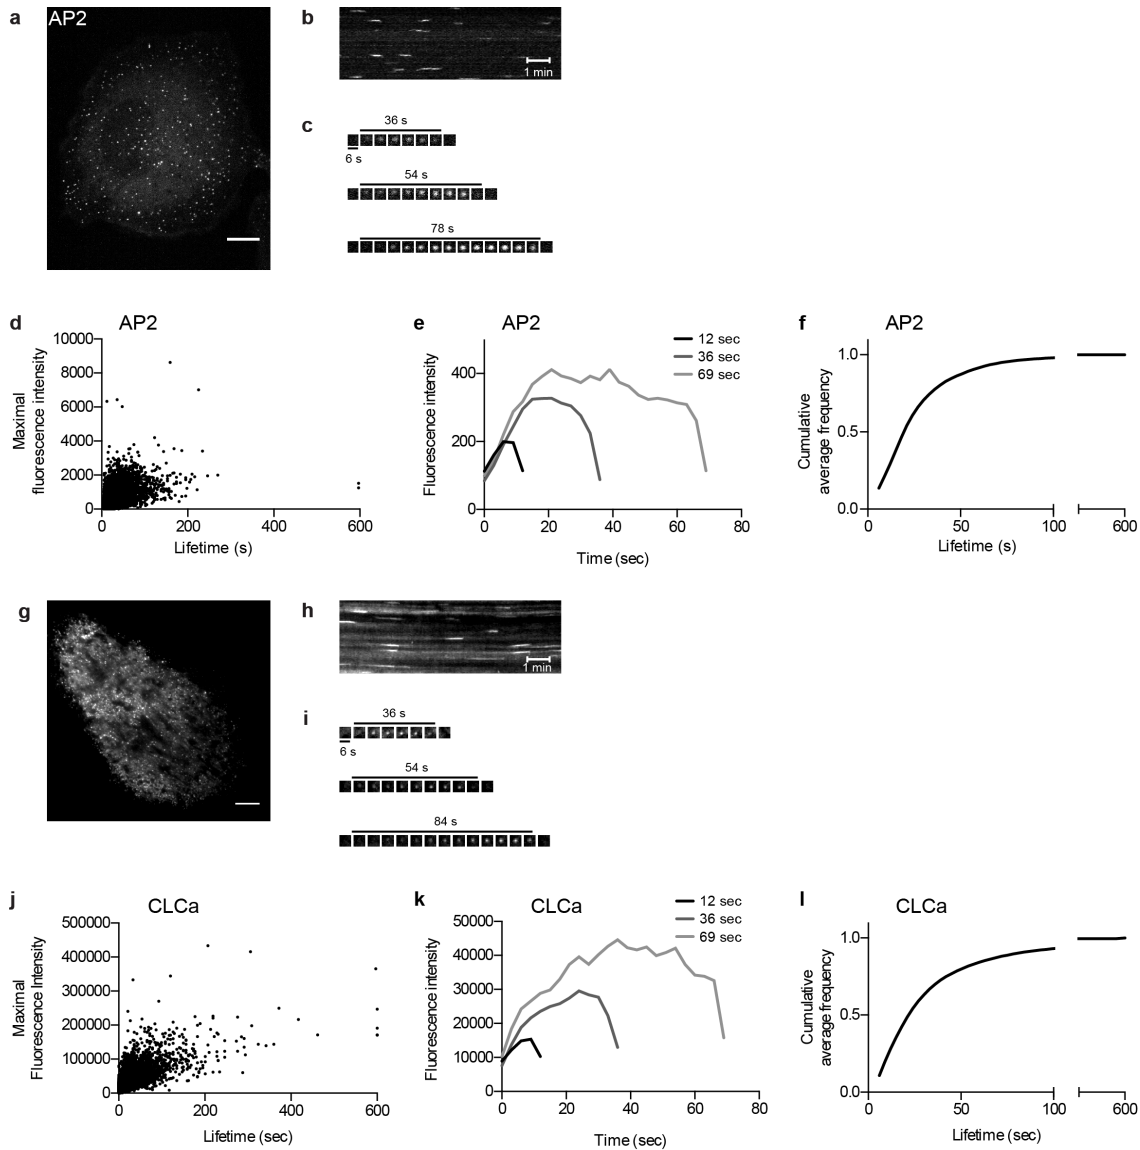

1046

1047

1048

**Supplementary Figure 1: Characterisation of clathrin dynamics in BSC-1 cells.**

1049

Spinning disc live-cell microscopy of BSC-1 AP2-eGFP cells. (a) Representative

1050

image of a BSC-1 AP2-eGFP cell. Scale bar: 10 μm. (b) Kymograph of a 10 minute long

1051

movie following AP2-eGFP signal. Scale bar: 1 min (c) Representative individual CME

1052

events. (d) Dot plot showing the lifetime and the maximal fluorescence intensity of

1053

AP2-eGFP of all CME events from one cell in a 10 minute long movie. Total number

1054

of tracked CME events: 14,694. (e) Average fluorescence intensity profiles (AP2-

1055

eGFP) of CME events with lifetime of 12, 36, and 69 seconds. Data are acquired from

1056

one cell during a 10 minute long movie. Number of tracks used for calculating the

1057

average intensity profiles: 1,525 for 12sec-lifetime; 604 for 36sec-lifetime; 230 for

1058 69sec-lifetime. (f) Cumulative average frequency of CME lifetime. The average was  
1059 calculated from five different cells. Number of total tracks per cell: 14,037; 16,386;  
1060 14,694; 16,797; 19,631. (g) TIRF live-cell microscopy of BSC-1 cells expressing  
1061 clathrin light chain a (CLCa)-tdtomato. Representative image of a BSC-1 cell  
1062 expressing CLCa-tdtomato. Scale bar: 10 $\mu$ m. (h) Kymograph of a 10 minute long  
1063 movie following CLCa-tdtomato. Scale bar: 1min (i) Representative individual CME  
1064 events. (j) Dot plot showing the lifetime and the maximal fluorescence intensity of  
1065 CLCa-tdtomato of all CME events from one cell in a 10 minute long movie. Total  
1066 number of tracked CME events: 4,763. (k) Average fluorescence intensity profiles  
1067 (CLCa-tdtomato) of CME events with lifetime of 12, 36, and 69 seconds. Data are  
1068 acquired from one cell during a 10 minute long movie. Number of tracks used for  
1069 calculating the average intensity profiles: 175 for 12sec-lifetime; 75 for 36sec-  
1070 lifetime; 21 for 69sec-lifetime. (l) Cumulative average frequency of CME lifetime.  
1071 The average was calculated from four different cells. Number of total tracks per cell:  
1072 2,429; 4,763; 5,443; 16,797; 8,393.

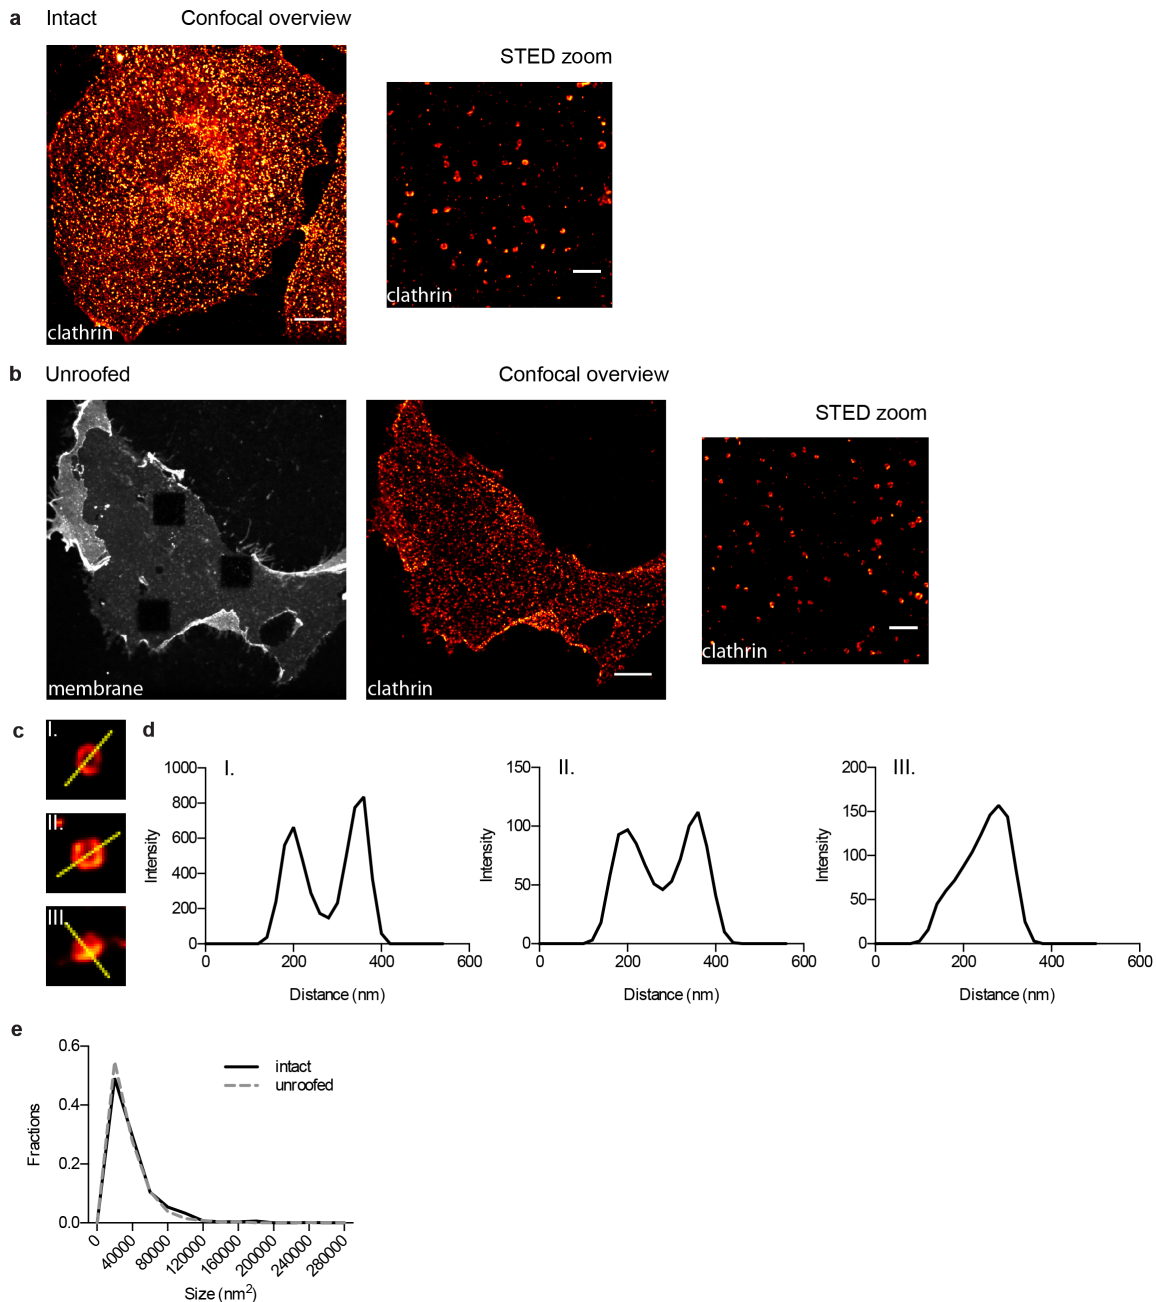

1073

1074

1075

**Supplementary Figure 2: Comparative STED nanoscopy analysis of CCS in**

1076 **intact vs. unroofed cells.** (a) STED nanoscopy of intact BSC-1 cells. CCS were

1077 immunostained with an anti-clathrin light chain (CLC) antibody. Left: confocal

1078 overview, scale bar: 5 $\mu$ m. Right: STED view, scale bar 1 $\mu$ m. (b) STED nanoscopy of

1079 unroofed BSC-1 cells. BSC-1 cells were unroofed by sonication; the remaining

1080 attached PM was stained with wheat germ agglutinin (WGA). CCS were

1081 immunostained with a an anti-clathrin antibody. Left: confocal overview, scale bar:

1082 5 $\mu$ m. Right: STED view, scale bar 1 $\mu$ m. (c) Example of different CCS and their  
1083 intensity line profile. Yellow line marks the axes measured for the intensity line  
1084 profiles. (d) Analysis of the size distribution of CCS in intact and unroofed cells. CCS  
1085 from five cells per conditions with three STED pictures per cell. Number of analysed  
1086 CCS for intact cells: 820 and unroofed cells: 1169.

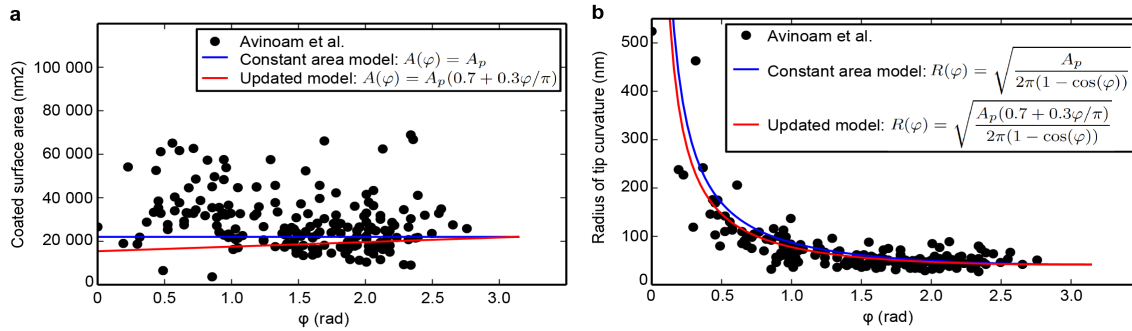

1087

1088

1089 **Supplementary Figure 3: Updated growth model explains the CLEM data from**

1090 **Avinoam *et al.*** (a) Clathrin coated surface area as a function of the growth angle  $\varphi$ .

1091 The constant area model where we assume  $A=22000\text{nm}^2$ , corresponding to the

1092 most probable surface area<sup>12</sup> is plotted (blue). Our updated model where we assume

1093 that the surface starts to bend when 70% of the final clathrin content is reached and

1094 grows the last 30% linear with  $\varphi$  plotted (red). The data (black dots) were extracted

1095 from Avinoam et al.<sup>19</sup>. (b) Radius of tip curvature as a function of the growth angle

1096  $\varphi$ . Again, the constant area model (blue) and our updated model (red) are plotted.

1097 The radius of the tip curvature is given assuming that the clathrin structure exhibits

1098 the shape of a spherical cap. Then the tip curvature reads  $R =$

1099  $\sqrt{A(\theta)/(2\pi(1 - \cos(\theta)))}$ . The data (black dots) were extracted from Avinoam et al.

1100 <sup>19</sup>.
